# Supplementary material for: Gas transfer velocities of CO 2 in subtropical monsoonal climate streams and small rivers
Source: Copernicus journal article supplement (doi:10.5194/bg-2018-227), 2018-06-04
Supplement: Supplementary file 1 [file bg-2018-227-supplement.pdf]

## Supporting material

### Gas transfer velocities of CO<sub>2</sub> in subtropical monsoonal climate streams and small rivers

Siyue Li\*, Rong Mao, Yongmei Ma, V.V.S.S. Sarma

Appendix Table A1. Dataset in relation to our study.

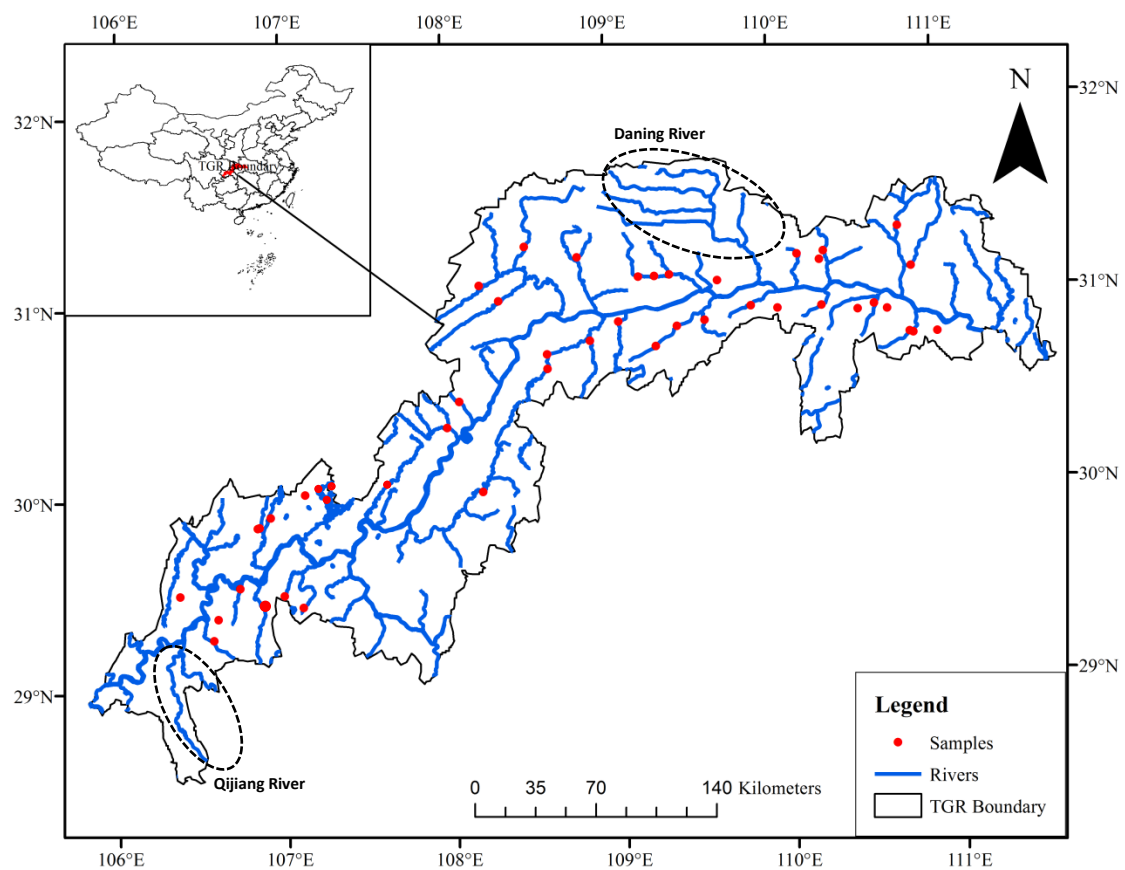

**Fig. S1.** Map of sampling locations of major rivers and streams in the Three Gorges Reservoir region, China.

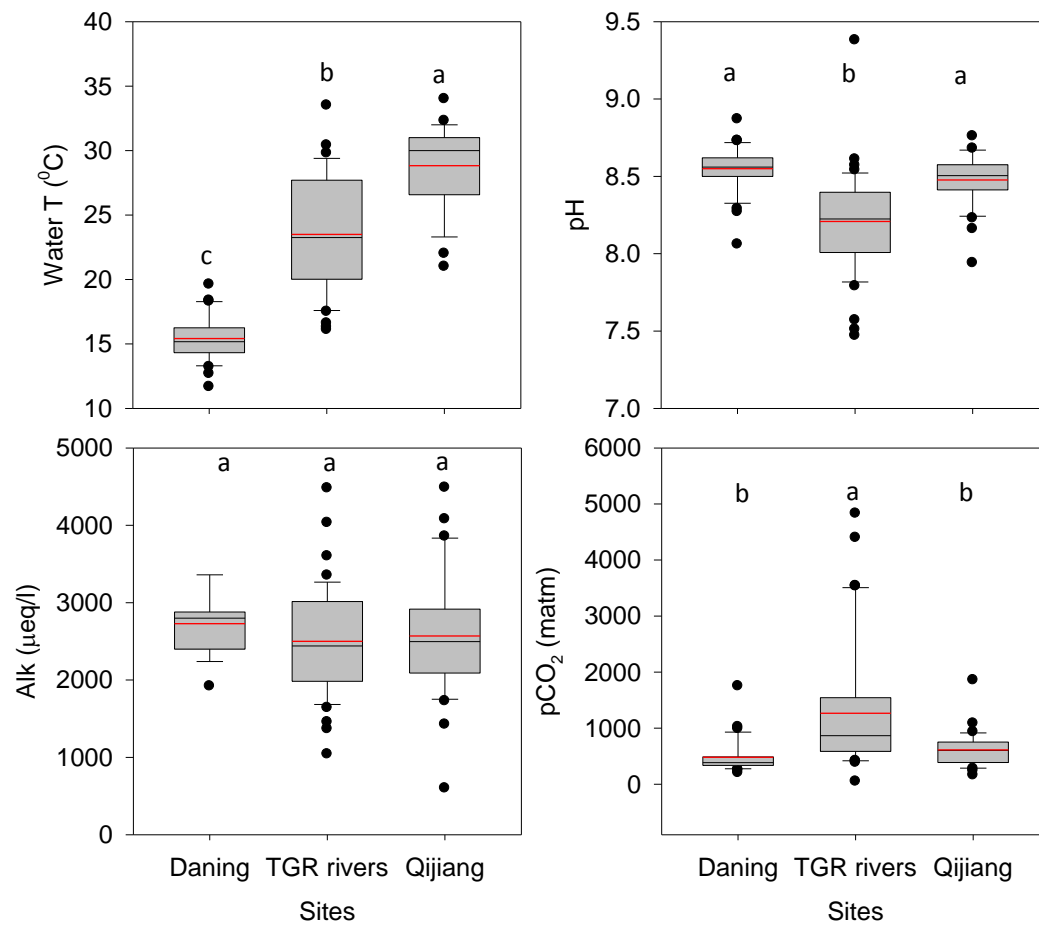

**Fig. S2.** Boxplots of water temperature, pH, alkalinity and pCO<sub>2</sub> in the subtropical rivers (different letters represent statistical differences at p<0.05). (the black and red lines, lower and upper edges, bars and dots in or outside the boxes represent median and mean values, 25th and 75th, 5th and 95th, and <5th and >95<sup>th</sup> percentiles of all data, respectively). (For interpretation of the references to color in this figure legend, the reader is referred to the web version of this article).

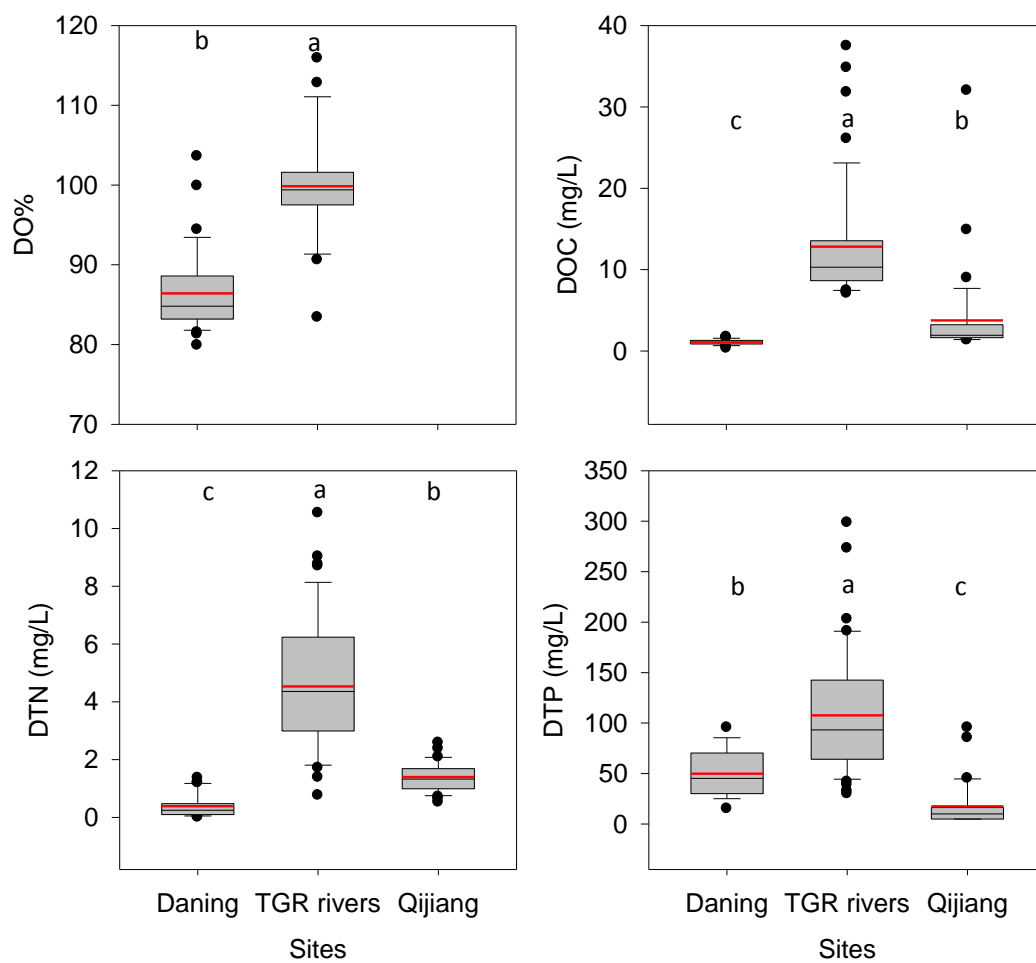

**Fig. S3.** Boxplots of organic carbon and nutrients in the subtropical rivers (different letters represent statistical differences at  $p < 0.05$ ). (the black and red lines, lower and upper edges, bars and dots in or outside the boxes demonstrate median and mean values, 25th and 75th, 5th and 95th, and  $<5^{\text{th}}$  and  $>95^{\text{th}}$  percentiles of all data, respectively). (For interpretation of the references to color in this figure legend, the reader is referred to the web version of this article).

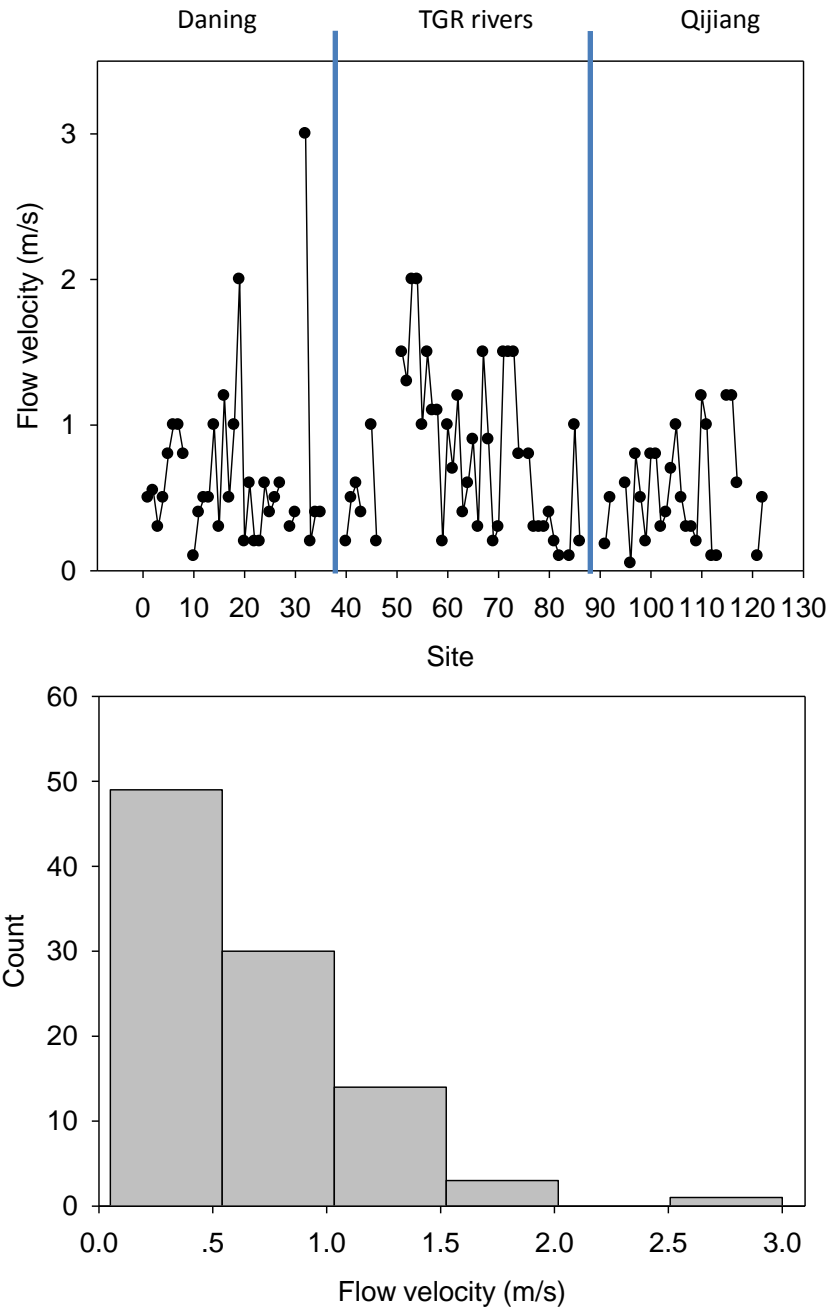

**Fig. S4.** Current velocity in our studied rivers.

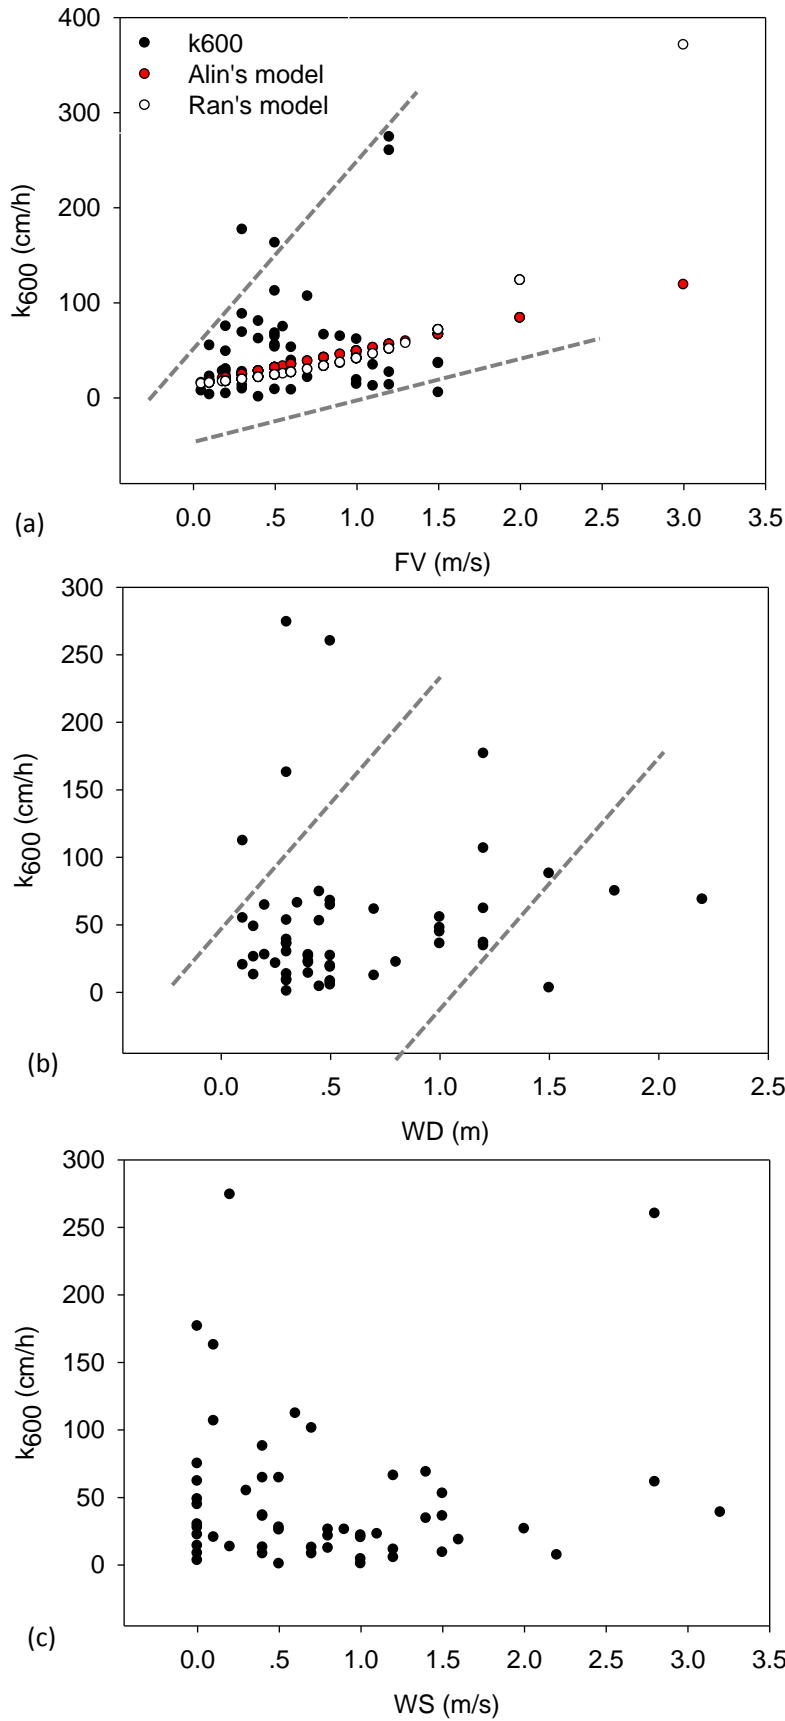

**Fig. S5.** Plots of  $k_{600}$  and flow velocity (FV, unit in m/s) (a), WD (water depth, unit in m) (b), and WS (wind speed, unit in m/s) (c). The circle and red-dotted lines in Fig. 3a

represent the model developed by Ran et al. (2015) and Alin et al (2011), respectively.

**Table S1.** Estimated  $k_{600}$  levels in our rivers.

|                 |             | Daning | TGR rivers | Qijiang | Total  |
|-----------------|-------------|--------|------------|---------|--------|
| Mean            |             | 50.23  | 40.36      | 60.20   | 48.41  |
| Median          |             | 50.46  | 30.04      | 25.81   | 32.22  |
| Std. Deviation  |             | 20.10  | 37.60      | 78.85   | 53.20  |
| Minimum         |             | 19.48  | 0.75       | 4.22    | 0.75   |
| Maximum         |             | 80.50  | 176.71     | 274.12  | 274.12 |
| Percentiles     | 25          | 35.809 | 12.628     | 13.213  | 16.303 |
|                 | 75          | 67.754 | 61.537     | 64.827  | 63.194 |
| 95% CI for Mean | Lower Bound | 35.86  | 27.02      | 24.31   | 35.12  |
|                 | Upper Bound | 64.61  | 53.69      | 96.10   | 61.70  |

CI-Confidence Interval

**Table S2.** Comparison of k values adopted by previous studies.

| River                         | Sites | Climate         | k               | Mean pCO <sub>2</sub> | CO <sub>2</sub> degassing flux | References        |
|-------------------------------|-------|-----------------|-----------------|-----------------------|--------------------------------|-------------------|
|                               |       |                 | cm/h            | ( $\mu$ atm)          | mmol/m <sup>2</sup> /d         |                   |
| Longchuan River               | China | Subtropic       | 8               | 2100                  | 156.2                          | Li et al., 2012   |
| Upper stream of Maotiao River | China | Subtropic       | 10              | 3740                  | 294.5                          | Wang et al., 2011 |
| Pearl River                   | China | Humid subtropic | 8-15            | 2600                  | 189-356                        | Yao et al., 2007  |
| Yangtze (Datong)              | China | Subtropic       | 8               | 1297                  | 38-148                         | Wang et al., 2007 |
| Rivers in TGR area*           | China | Subtropic       | 48.4 $\pm$ 53.2 | 846 $\pm$ 819         | 133.1 $\pm$ 269.1              | This study        |
| Yangtze*                      | China | Subtropic       | 38 $\pm$ 40     | 1000-2035             |                                | Liu et al., 2017  |
| Yellow river network*         | China | Temperate       | 42.1 $\pm$ 16.9 | 2810 $\pm$ 1985       | 856 $\pm$ 409                  | Ran et al., 2015  |
| Wuding*                       | China | Temperate       | 29-37           | 881                   | 116-218                        | Ran et al., 2017  |

\*k levels are from measurements

## References

- Alin, S.R., Rasera, M., Salimon, C.I., Richey, J.E., Holtgrieve, G.W., Krusche, A.V., Snidvongs, A., 2011. Physical controls on carbon dioxide transfer velocity and flux in low-gradient river systems and implications for regional carbon budgets. *Journal of Geophysical Research-Biogeosciences* 116. G01009.
- Li, S.Y., Lu, X.X., He, M., Zhou, Y., Li, L., Ziegler, A.D., 2012. Daily CO<sub>2</sub> partial pressure and CO<sub>2</sub> outgassing in the upper Yangtze River basin: A case study of the Longchuan River, China. *Journal of Hydrology* 466, 141-150.
- Liu, S., Lu, X.X., Xia, X., Yang, X., Ran, L., 2017. Hydrological and geomorphological control on CO<sub>2</sub> outgassing from low-gradient large rivers: An example of the Yangtze River system. *Journal of Hydrology* 550, 26-41.
- Ran, L.S., Lu, X.X., Yang, H., Li, L.Y., Yu, R.H., Sun, H.G., Han, J.T., 2015. CO<sub>2</sub> outgassing from the Yellow River network and its implications for riverine carbon cycle. *Journal of Geophysical Research-Biogeosciences* 120, 1334-1347.
- Wang, F., Wang, B., Liu, C.Q., Wang, Y., Guan, J., Liu, X., Yu, Y., 2011. Carbon dioxide emission from surface water in cascade reservoirs–river system on the Maotiao River, southwest of China. *Atmospheric Environment* 45, 3827-3834.
- Wang, X.F., He, Y.X., Yuan, X.Z., Chen, H., Peng, C.H., Zhu, Q., Yue, J.S., Ren, H.Q., Deng, W., Liu, H., 2017. pCO<sub>2</sub> and CO<sub>2</sub> fluxes of the metropolitan river network in relation

to the urbanization of Chongqing, China. Journal of Geophysical Research-Biogeosciences 122, 470-486.

Yao, G.R., Gao, Q.Z., Wang, Z.G., Huang, X.K., He, T., Zhang, Y.L., Jiao, S.L., Ding, J., 2007. Dynamics Of CO2 partial pressure and CO2 outgassing in the lower reaches of the Xijiang River, a subtropical monsoon river in China. Science of the Total Environment 376, 255-266.

**Dataset APPENDIX TABLE A1  
(Daning River)**

| Time            | River | Latitude  | Longitude  | Air pressure | a.s.l. | T(water) | pH   | EC(Cond) | EC(SPC) | TDS  | DO   | DO   | River width | River depth | Water velocity | Alkalinity | DOC  | TDN  | TDP   |
|-----------------|-------|-----------|------------|--------------|--------|----------|------|----------|---------|------|------|------|-------------|-------------|----------------|------------|------|------|-------|
|                 |       |           |            | hPa          | m      | °C       |      | µs/cm    | µs/cm   | mg/L | %    | mg/L | m           | m           | m/s            | µeq/L      | mg/L | mg/L | µg/L  |
| 2016.5.19:9:21  | XJH1  | 31°23'54" | 109°31'25" | 979          | 290    | 15.58    | 8.27 | 266.8    | 325.3   | 211  | 81.3 | 8.09 | 5           | 0.5         | 0.5            | 3200       | 1.09 | 1.37 | 30.15 |
| 2016.5.19,10:25 | XJH2  | 31°23'48" | 109°30'48" | 982.1        | 240    | 18.294   | 8.06 | 353.1    | 405     | 263  | 88.9 | 8.36 | 10          | 0.45        | 0.55           | 3360       | 1.57 | 1.21 | 25.13 |
| 2016.5.19,11:00 | XJH3  | 31°24'20" | 109°31'26" | 988          | 160    | 18.138   | 8.29 | 347.2    | 399.5   | 260  | 86.1 | 8.12 | 10          | 0.5         | 0.3            | 3360       | 1.74 | 1.07 | 45.23 |
| 2016.5.19,11:42 | XJH4  | 31°23'54" | 109°33'33" | 989          | 210    | 18.275   | 8.39 | 349      | 400.4   | 260  | 83.7 | 7.87 | 10          | 0.3         | 0.5            | 3360       | 1.32 | 1.20 | 30.15 |
| 2016.5.19,15:20 | HXH1  | 31°27'48" | 109°21'14" | 967          | 340    | 14.326   | 8.58 | 151.5    | 190.2   | 124  | 87   | 8.91 | 15          | 0.5         | 0.8            | 2320       | 1.15 | 0.54 | 30.15 |
| 2016.5.19,16:00 | HXH2  | 31°28'49" | 109°26'0"  | 973          | 320    | 14.136   | 8.53 | 159.1    | 200.7   | 130  | 84   | 8.63 | 8           | 2           | 1              | 2240       | 0.71 | 0.16 | 75.38 |
| 2016.5.19,16:32 | HXH3  | 31°27'54" | 109°30'8"  | 979          | 260    | 14.473   | 8.53 | 162.9    | 203.8   | 132  | 84.4 | 8.61 | 10          | 0.5         | 1              | 2240       | 0.67 | 0.38 | 55.28 |
| 2016.5.19,17:07 | HXH4  | 31°27'46" | 109°36'49" | 987          | 260    | 15.177   | 8.55 | 211.7    | 260.6   | 169  | 84.8 | 8.51 | 20          | 0.8         | 0.8            | 2400       | 1.28 | 0.36 | 40.20 |
| 2016.5.19,17:32 | DNH1  | 31°27'35" | 109°38'6"  | 1000         | 230    | 15.221   | 8.56 | 220.4    | 271.1   | 176  | 84.6 | 8.48 |             |             |                | 2400       | 1.39 | 0.12 | 85.43 |
| 2016.5.20,10:19 | DXH1  | 31°39'48" | 109°33'7"  | 958          | 540    | 16.248   | 8.53 | 218.4    | 262     | 170  | 84.1 | 8.25 | 0.5         | 0.1         | 0.1            | 2800       | 1.41 | 0.18 | 40.20 |
| 2016.5.20,10:55 | DXH2  | 31°39'46" | 109°33'6"  | 965          | 560    | 15.106   | 8.55 | 226.3    | 279     | 181  | 84.4 | 8.49 | 50          | 0.3         | 0.4            | 2800       | 1.21 | 0.33 | 50.25 |
| 2016.5.20,11:20 | DXH3  | 31°39'3"  | 109°39'46" | 970          | 430    | 14.55    | 8.62 | 222.6    | 278.1   | 181  | 83.6 | 8.51 | 2           | 0.3         | 0.5            | 2880       | 0.89 | 0.26 | 75.38 |
| 2016.5.20,11:54 | DXH4  | 31°38'3"  | 109°40'11" | 973          | 130    | 16.153   | 8.6  | 241      | 289.5   | 188  | 82.5 | 8.12 | 25          | 0.5         | 0.5            | 2800       | 1.20 | 0.17 | 55.28 |
| 2016.5.20,14:09 | DXH5  | 31°36'16" | 109°40'34" | 974          | 360    | 16.389   | 8.71 | 242.2    | 289.9   | 188  | 87.6 | 8.57 | 20          | 1           | 1              | 2720       | 0.98 | 0.66 | 15.08 |
| 2016.5.20,14:40 | DXH6  | 31°34'23" | 109°39'11" | 981          | 320    | 16.417   | 8.71 | 238.5    | 285.2   | 185  | 88.6 | 8.66 | 25          | 0.5         | 0.3            | 2800       | 1.34 | 0.33 | 30.15 |



|                 |       |           |            |     |     |        |      |       |       |     |       |       |     |     |     |      |      |      |       |
|-----------------|-------|-----------|------------|-----|-----|--------|------|-------|-------|-----|-------|-------|-----|-----|-----|------|------|------|-------|
| 2016.5.20;15:03 | DNH2  | 31°31'31" | 109°37'18" | 985 | 270 | 14.886 | 8.62 | 189.4 | 234.7 | 153 | 89.7  | 9.07  | 50  | 1   | 1.2 | 2880 | 0.66 | 0.12 | 40.20 |
| 2016.5.20;15:35 | DNH3  | 31°28'1"  | 109°38'9"  | 987 | 260 | 16.689 | 8.73 | 193.5 | 229.9 | 149 | 94.4  | 9.16  | 50  | 1   | 0.5 | 2480 | 0.97 |      | 40.20 |
| 2016.5.20;16:23 | XXH1  | 31°32'16" | 109°37'5"  | 983 | 260 | 14.772 | 8.67 | 176.2 | 219   | 142 | 92.8  | 9.4   | 25  | 1.5 | 1   | 2400 | 1.02 | 0.21 | 95.48 |
| 2016.5.20;16:53 | DXH7  | 31°32'13" | 109°36'39" | 984 | 280 | 15.984 | 8.61 | 228.9 | 276.5 | 180 | 89    | 8.78  | 8   | 1.5 | 2   | 2560 | 0.99 | 0.08 | 50.25 |
| 2016.5.20;18:15 | DXH8  | 31°39'48" | 109°40'15" |     | 500 | 15.84  | 8.56 | 279.1 | 338.2 | 220 | 82.8  | 8.2   | 2   | 0.2 | 0.2 | 3120 | 1.19 | 0.24 | 75.38 |
| 2016.5.21;10:18 | XXH2  | 31°39'48" | 109°10'8"  | 922 | 860 | 11.671 | 8.54 | 131.5 | 176.4 | 115 | 81.5  | 8.84  | 4   | 0.5 | 0.6 | 2640 | 0.95 | 0.04 | 45.23 |
| 2016.5.21;10:57 | XXH3  | 31°38'11" | 109°11'58" | 888 |     | 15.278 | 8.73 | 239.1 | 293.5 | 191 | 82    | 8.22  | 1.5 | 0.1 | 0.2 | 2400 | 0.78 | 0.42 | 30.15 |
| 2016.5.21;11:11 | XXH4  | 31°37'46" | 109°14'17" | 947 | 670 | 13.934 | 8.71 | 187.7 | 238   | 155 | 85.8  | 8.85  | 15  | 1   | 0.2 | 2880 | 1.62 | 0.46 | 55.28 |
| 2016.5.21;13:15 | XXH5  | 31°37'12" | 109°4'31"  | 912 | 930 | 13.93  | 8.57 | 187.6 | 237.9 | 155 | 79.9  | 8.24  | 4   | 0.2 | 0.6 | 2800 | 0.87 | 0.45 | 70.35 |
| 2016.5.21;13:47 | XXH6  | 31°36'10" | 109°7'53"  | 934 | 780 | 12.688 | 8.5  | 135.8 | 177.6 | 115 | 83.2  | 8.82  | 8   | 0.5 | 0.4 | 2800 | 0.33 | 0.17 | 85.43 |
| 2016.5.21;14:24 | XXH7  | 31°37'7"  | 109°8'27"  | 929 | 780 | 13.358 | 8.56 | 200.5 | 257.9 | 168 | 82.8  | 8.65  | 3   | 0.5 | 0.5 | 2960 | 1.59 | 0.07 | 85.43 |
| 2016.5.21;14:55 | XXH8  | 31°36'29" | 109°9'59"  | 939 | 700 | 14.696 | 8.46 | 210.7 | 262.4 | 171 | 83    | 8.42  | 3   | 0.3 | 0.6 | 2880 | 0.53 | 0.08 | 25.13 |
| 2016.5.21;15:21 | XXH9  | 31°35'21" | 109°12'16" | 944 | 660 | 14.319 | 8.57 | 151.7 | 190.6 | 124 | 83.9  | 8.58  | 25  | 0.3 |     | 2240 | 0.87 | 0.11 | 30.15 |
| 2016.5.21;15:43 | XXH10 | 31°35'23" | 109°16'4"  | 951 | 600 | 15.092 | 8.6  | 155.3 | 191.6 | 125 | 85    | 8.55  | 25  | 0.4 | 0.3 | 2240 | 0.69 | 0.08 | 25.13 |
| 2016.5.21;16:16 | XXH11 | 31°35'23" | 109°17'28" | 945 | 660 | 13.219 | 8.46 | 125.9 | 162.5 | 106 | 84.9  | 8.9   | 4   | 0.2 | 0.4 | 1920 | 0.70 | 0.01 | 35.18 |
| 2016.5.21;17:05 | XXH12 | 31°34'37" | 109°25'54" | 967 | 490 | 16.142 | 8.87 | 198.9 | 239.5 | 156 | 103.6 | 10.19 |     |     |     | 2720 | 0.95 | 0.01 | 65.33 |
| 2016.5.21;18:07 | XXH13 | 31°33'54" | 109°34'13" | 982 | 340 | 14.455 | 8.46 | 176.3 | 220.8 | 144 | 92.1  | 9.39  | 8   | 2.5 | 3   | 2560 | 1.13 | 0.33 | 65.33 |
| 2016.5.22;9:26  | DNH4  | 31°23'25" | 109°37'27" | 997 | 210 | 16.187 | 8.5  | 213.2 | 256.2 | 166 | 86.8  | 8.54  | 25  |     | 0.2 | 2800 | 1.19 | 0.09 | 30.15 |
| 2016.5.22;9:44  | XJH5  | 31°23'26" | 109°37'25" | 997 | 180 | 18.37  | 8.35 | 358.7 | 410.7 | 267 | 86.1  | 8.08  | 8   |     | 0.4 | 3360 | 1.32 | 1.16 | 70.35 |
| 2016.5.22;10:15 | DNH5  | 31°23'38" | 109°37'49" | 997 | 230 | 19.618 | 8.68 | 292   | 325.5 | 212 | 99.9  | 9.15  | 2   | 0.2 | 0.4 | 3200 | 1.10 | 0.72 | 45.23 |

**(TGR rivers)**

| Time            | Code   | Latitude  | Longitude  | asl | T(air) | Wind speed | T(water) | pH   | ORP   | EC    | DO   | DO    | River width | River depth | Water velocity | Alk   | DOC   | DTN  | DTP    |
|-----------------|--------|-----------|------------|-----|--------|------------|----------|------|-------|-------|------|-------|-------------|-------------|----------------|-------|-------|------|--------|
|                 |        |           |            | m   | °C     | m/s        | °C       |      | mv    | µs/cm | mg/L | %     | m           | m           | m/s            | µeq/L | mg/L  | mg/L | µg/L   |
| 2016.6.21;13:41 | BLXX   | 29°30'30" | 106°59'26" | 432 | 39.1   | 0.6        | 29.1     | 7.57 |       | 233   |      |       |             |             |                | 1880  | 26.08 | 3.88 | 76.12  |
| 2016.6.21;15:00 | BLTH   | 29°26'47" | 107°06'11" | 700 | 33.2   | 1.1        | 24.7     | 7.47 |       | 225   |      |       | 15          | 0.4         | 0.2            | 1976  | 37.48 | 7.03 | 120.89 |
| 2016.6.22;09:04 | BNB    | 30°01'50" | 108°11'32" | 616 | 28.2   | 0          | 20       | 7.96 |       | 125.8 |      |       | 11          | 0.3         | 0.5            | 1040  | 14.31 | 1.94 | 82.84  |
| 2016.6.22;10:00 | BLH    | 29°17'53" | 108°55'00" | 518 | 29.9   | 0.4        | 23.5     | 7.84 |       | 202.3 |      |       | 80          | 0.5         | 0.6            | 1840  | 22.03 | 3.09 | 143.28 |
| 2016.6.22;12:00 | BHJH   | 30°22'07" | 107°59'10" | 181 | 33.5   | 1          | 29       | 7.79 |       | 418   |      |       | 4           | 0.3         | 0.4            | 3128  | 13.56 | 3.09 | 138.81 |
| 2016.6.22;13:14 | BRXH   | 30°30'10" | 108°03'45" | 215 | 36.1   | 0.5        | 33.5     | 7.82 |       | 344   |      |       |             |             |                | 3112  | 31.80 | 7.19 | 108.95 |
| 2016.6.22;18:00 | BDH    | 31°18'07" | 108°28'52" | 193 | 32.5   | 2.8        | 29.3     | 8.25 | 128   | 976   | 8.49 | 115.9 | 6           | 0.7         | 1              | 2152  | 10.30 | 1.71 | 44.78  |
| 2016.6.23;10:00 | BNH    | 31°06'21" | 108°12'02" | 43  | 31.9   | 0          | 30.4     | 8.06 | 159.3 | 359   | 6.61 | 90.6  | 6           | 0.15        | 0.2            | 4032  | 34.82 | 3.45 | 140.30 |
| 2016.6.23;11:25 | BPLH   | 31°01'18" | 108°18'58" | 152 | 33.3   | 0.9        | 29.4     | 8.15 | 155.9 | 269   | 6.07 | 83.4  |             |             |                | 1688  | 10.47 | 2.96 | 140.30 |
| 2016.6.23;15:47 | BMDX   | 30°44'15" | 108°36'07" | 217 | 31.6   | 0.8        | 22.2     | 8.42 | 115.2 | 203   | 8.34 | 101   |             |             |                | 1640  | 7.54  | 3.22 | 29.85  |
| 2016.6.23;16:22 | BSBH   | 30°39'42" | 108°36'07" | 256 | 32.5   | 0          | 28.9     | 8.61 | 81    | 240   | 7.63 | 104.1 |             |             |                | 2536  | 16.56 | 3.58 | 62.69  |
| 2016.6.23;18:56 | BDXH   | 30°48'04" | 108°51'47" | 132 | 31.2   | 0.7        | 29.4     | 8.21 | 58.9  | 870   | 8.36 | 112.8 |             |             |                | 3256  | 10.00 | 1.81 | 41.79  |
| 2016.6.24;14:34 | BCTH   | 30°53'48" | 109°02'20" | 138 | 25.4   | 1.2        | 22.2     | 7.89 | 99.1  | 102.3 | 8.43 | 99.2  | 4           | 0.5         | 1.5            | 1368  | 9.95  | 2.66 | 95.52  |
| 2016.6.25;12:00 | BMXH   | 30°45'40" | 109°15'37" | 558 | 22.3   | 2.8        | 17.7     | 8.14 | 85.5  | 211   | 8.98 | 98.9  | 20          | 0.4         | 1.3            | 2488  | 7.30  | 6.34 | 77.61  |
| 2016.6.25;13:30 | BMXH-2 | 30°51'44" | 109°23'34" | 317 | 23.5   | 0.6        | 17.8     | 8.19 | 92.2  | 320   | 9    | 96.7  | 25          | 0.5         | 2              | 2704  | 8.68  | 4.43 | 71.64  |
| 2016.6.25;15:10 | BJPH   | 30°53'19" | 109°33'38" | 149 | 23.3   | 1.4        | 17.6     | 8.38 | 64.1  | 265   | 8.89 | 99.4  | 30          | 1           | 2              | 2392  | 10.23 | 4.34 | 50.75  |
| 2016.6.26;12:23 | BGDH   | 30°57'15" | 109°50'36" | 366 | 27     | 0          | 16.1     | 8.26 | 38.3  | 278   | 9.44 | 98.3  | 30          | 1.5         | 1              | 3016  | 9.92  | 1.97 | 59.70  |
| 2016.6.26;15:36 | BBLH   | 30°56'09" | 110°00'17" | 197 | 25.1   | 0          | 16.6     | 8.36 | 7.9   | 279   | 8.54 | 94.3  | 30          | 0.5         | 1.5            | 3112  | 7.45  | 4.66 | 98.51  |
| 2016.6.27;11:32 | BWFH   | 30°56'26" | 110°16'15" | 402 | 28.1   | 1.4        | 16.3     | 8.4  | 9.03  | 303   | 9.03 | 101.2 | 6           | 1.2         | 1.1            | 2520  | 8.53  | 5.42 | 57.46  |
| 2016.6.27;14:07 | BLFD   | 30°56'16" | 110°35'19" | 216 | 30.4   | 0.8        | 21.3     | 8.35 | 48.6  | 290   | 8.56 | 99.5  | 4           | 0.7         | 1.1            | 2216  |       | 4.39 | 68.66  |
| 2016.6.27;15:00 | BQGH   | 30°54'45" | 110°29'20" | 237 | 31.2   | 0          | 22.8     | 8.45 | 29.1  | 324   | 8.61 | 101.4 | 7           | 0.4         | 0.2            | 2904  | 9.81  | 6.88 | 80.60  |
| 2016.6.27;16:48 | BJZH   | 30°54'30" | 110°39'58" | 220 | 29.5   | 0          | 22.1     | 8.45 | 33.5  | 320   | 8.14 | 101.2 | 7           | 0.4         | 1              | 2664  | 8.64  | 6.18 | 47.76  |
| 2016.6.27;18:00 | BJWX   | 30°46'41" | 110°49'00" | 152 | 28.3   | 0.1        | 18.3     | 8.39 | 25.5  | 280   | 9.52 | 103.8 | 25          | 1.2         | 0.7            | 2616  | 8.33  | 4.76 | 104.48 |

|                 |           |           |            |     |      |     |      |      |      |       |      |       |     |     |     |      |       |       |        |
|-----------------|-----------|-----------|------------|-----|------|-----|------|------|------|-------|------|-------|-----|-----|-----|------|-------|-------|--------|
| 2016.6.27;18:30 | BJWX-2    | 30°47'04" | 110°47'44" | 242 | 29.2 | 2   | 20.1 | 8.33 | 21.8 | 314   | 8.63 | 98.2  | 3   | 0.4 | 1.2 | 2616 | 8.65  | 4.07  | 73.13  |
| 2016.6.28;10:20 | BMPH      | 30°46'47" | 110°57'44" | 137 | 29.3 | 1   | 21.1 | 8.35 | 32.5 | 353   | 8.63 | 96.8  | 1.2 | 0.4 | 0.4 | 3352 | 11.20 | 3.61  | 161.19 |
| 2016.6.28;14:40 | BGLH      | 31°07'27" | 110°49'21" | 120 | 33.9 | 3.2 | 21.5 | 8.52 | -1.6 | 321   | 8.3  | 101.8 | 15  | 0.3 | 0.6 | 3008 | 22.38 | 8.76  | 44.78  |
| 2016.6.28;16:20 | BXXH      | 31°20'07" | 110°45'02" | 185 | 33.1 | 1.5 | 19.9 | 8.51 | 31.9 | 330   |      |       | 12  | 0.3 | 0.9 | 3200 | 11.82 | 2.34  | 176.12 |
| 2016.6.29;10:44 | BLTH-XXGQ | 30°13'32" | 110°32'47" | 745 | 26.9 | 1.1 | 17.6 | 8.57 | 64.3 | 208   | 8.26 | 98.7  | 7   | 1.2 | 0.3 | 2616 | 7.08  | 1.81  | 191.04 |
| 2016.6.29;11:32 | BSNX      | 31°13'22" | 110°17'39" | 125 | 33.7 | 0.4 | 19.3 | 9.38 | 8.6  | 232   |      |       | 22  | 1.2 | 1.5 | 2368 | 7.44  | 1.91  | 32.84  |
| 2016.6.29;14:32 | BLXB      | 31°10'45" | 110°16'07" | 171 | 37.8 | 0.4 | 29.8 | 8.49 | -2   | 378   |      |       | 6   | 0.2 | 0.9 | 3600 | 11.09 | 4.63  | 58.21  |
| 2016.6.29;16:31 | BBCH      | 31°12'47" | 110°08'03" | 631 | 33.8 | 0   | 27.7 | 8.24 | 3.5  | 438   |      |       | 5   | 0.3 | 0.2 | 4480 | 21.81 | 9.03  | 86.57  |
| 2016.6.29;17:29 | BCaoT     | 31°05'31" | 109°38'46" | 193 | 33.6 | 1.5 | 28.7 | 8.54 | 96.8 | 501   |      |       | 4   | 0.3 | 0.3 | 3176 | 11.23 | 8.70  | 202.98 |
| 2016.6.30;10:40 | BCJH      | 31°07'56" | 109°21'21" | 129 | 30.7 | 0.4 | 22.8 | 8.5  | 20.3 | 371   |      |       | 22  | 1   | 1.5 | 2616 | 8.35  | 3.61  | 128.36 |
| 2016.6.30;11:10 | BMeiXH    | 31°07'37" | 109°15'54" | 140 | 27.3 | 5   | 21.6 | 8.38 | 22.7 | 218   |      |       | 30  | 0.4 | 1.5 | 1968 | 9.53  | 4.60  | 85.82  |
| 2016.6.30;11:40 | BCJB      | 31°07'35" | 109°10'06" | 288 | 27.8 | 0.5 | 22.9 | 8.34 | 23.8 | 162.8 |      |       | 35  | 1.2 | 1.5 | 1456 | 7.22  | 6.24  | 73.13  |
| 2016.6.30;15:21 | BTXH      | 31°14'17" | 108°48'00" | 164 | 25   | 0.8 | 17.5 | 8.3  | 9.7  | 162   |      |       | 25  | 1.5 | 0.8 | 1936 | 8.28  | 0.76  | 38.81  |
| 2016.7.01;10:31 | BGaoTH    | 30°17'31" | 107°27'33" | 331 | 25.9 | 0.7 | 23.3 | 7.93 | 32.3 | 249   |      |       |     |     |     | 2290 | 9.28  | 6.93  | 273.13 |
| 2016.7.01;11:28 | BGJH      | 30°12'35" | 107°29'47" | 354 | 28.5 | 0   | 23.3 | 8.14 | 29.9 | 274   |      |       | 15  | 2.2 | 0.8 | 2270 | 12.18 | 3.52  | 101.49 |
| 2016.7.01;12:30 | BQXH      | 30°06'21" | 107°31'06" | 378 | 29.2 | 1.4 | 23.4 | 8.17 | 69.3 | 258   |      |       | 25  | 2.2 | 0.3 | 2260 | 11.80 | 4.57  | 147.76 |
| 2016.7.01;14:41 | BLXH      | 29°50'30" | 107°08'58" | 190 | 33.3 | 0   | 25.9 | 7.51 | 54.6 | 379   |      |       | 30  | 1.2 | 0.3 | 2340 | 12.30 | 8.08  | 191.04 |
| 2016.7.01;15:54 | BTXH      | 30°01'59" | 107°07'23" | 328 | 29.6 | 0.4 | 24.7 | 7.86 | 40.7 | 377   |      |       | 15  | 1.5 | 0.3 | 2100 | 13.95 | 10.54 | 298.51 |
| 2016.7.02;10:50 | BWTH      | 29°51'42" | 106°50'08" | 194 | 32.2 | 0   | 23.3 | 8.16 | 36.3 | 300   |      |       | 30  | 1.2 | 0.4 | 2664 | 10.59 | 2.01  | 89.55  |
| 2016.7.02;11:17 | BYLH      | 29°51'54" | 106°50'49" | 149 | 34.6 | 0   | 24.4 | 8.17 | 37.6 | 264   |      |       | 45  | 1.8 | 0.2 | 1880 | 9.13  | 1.38  | 144.78 |
| 2016.7.02;11:37 | BDH-YB    | 29°54'59" | 106°54'51" | 134 | 33.9 | 0   | 27.6 | 7.99 | 59.1 | 322   |      |       | 45  | 1.5 | 0.1 | 2296 | 10.86 | 4.93  | 94.78  |
| 2016.7.02;14:49 | BCTH-YL   | 29°32'59" | 106°43'35" | 181 | 35.5 | 0.4 | 27.7 | 8.18 | 44   | 270   |      |       |     |     |     | 2008 | 10.72 | 4.57  | 135.82 |
| 2016.7.02;16:04 | BHXH      | 29°23'19" | 106°35'37" | 208 | 31.2 | 0   | 23.2 | 8.08 | 73.2 | 303   |      |       | 20  | 0.8 | 0.1 | 2176 | 9.86  | 6.37  | 144.78 |
| 2016.7.02;17:25 | BYPH      | 29°16'46" | 106°34'01" | 118 | 31   | 0   | 24.2 | 8.1  | 74.9 | 232   |      |       | 35  | 1   | 1   | 1912 | 8.43  | 3.55  | 91.79  |
| 2016.7.02;18:23 | BLTH-BSY  | 29°30'35" | 106°22'00" | 271 | 31.3 | 0.4 | 28.1 | 7.87 | 12.6 | 462   |      |       | 6   | 0.6 | 0.2 | 3144 | 14.15 | 6.24  | 159.70 |

**(Qijiang River)**

| Date      | Time  | River | T(air)<br>°C | Wind speed<br>m/s | T(water)<br>°C | pH   | EC<br>µs/cm | TDS<br>mg/L | River width<br>m | River depth<br>m | Water velocity<br>m/s | Alk<br>µeq/L | DOC<br>mg/L | TDN<br>mg/L | TDP<br>mg/L |
|-----------|-------|-------|--------------|-------------------|----------------|------|-------------|-------------|------------------|------------------|-----------------------|--------------|-------------|-------------|-------------|
| 2016.8.15 | 13:30 | BZD1  | 39.6         | 0.5               | 30             | 8.41 | 351.6       | 229         | 3                | 20               | 0.18                  | 2920         | 1.34        | 2.58        | 10.05       |
|           | 14:30 | BZD2  | 40.5         | 1                 | 25             | 8.59 | 317         | 206         | 20               | 40               | 0.5                   | 2472         | 1.61        | 2.09        | 10.05       |
|           | 15:30 | BZD3  | 37.3         | 0.7               | 31             | 8.67 | 301.8       | 196         |                  |                  |                       | 2656         | 2.32        | 1.99        | 5.03        |
|           | 15:40 | BZD4  | 34.4         | 0.6               | 31             | 8.52 | 269.1       | 175         |                  |                  |                       | 1824         | 14.88       | 0.53        | 5.03        |
|           | 16:10 | BZD5  | 33.7         | 1.6               | 32             | 8.52 | 282.5       | 184         | 20               | 80               | 0.6                   | 2336         | 1.48        | 0.87        | 5.03        |
|           | 16:45 | BZD6  | 34.4         | 2.2               | 30             | 8.3  | 448.2       | 292         | 2                | 50               | 0.05                  | 2216         | 1.65        | 1.89        | 5.03        |
| 2016.8.16 | 9:10  | BSY1  | 31           | 0.4               | 22             | 8.64 | 322.3       | 210         | 3                | 60               | 0.8                   | 3056         | 2.00        | 1.01        | 5.03        |
|           | 9:50  | BSY2  | 33.1         | 0.5               | 23.3           | 8.49 | 345         | 224         | 6                | 50               | 0.5                   | 2896         | 1.65        | 0.97        | 10.05       |
|           | 10:25 | BSY3  | 31.6         | 1                 | 23.5           | 7.94 | 374.7       | 244         | 20               | 45               | 0.2                   | 2520         | 1.39        | 1.12        |             |
|           | 13:40 | BSK1  | 32.2         | 1                 | 26.8           | 8.63 | 513.8       | 334         | 1                | 15               | 0.8                   | 2552         | 4.46        | 1.99        | 5.03        |
|           | 14:20 | BSK2  | 36.1         | 1.2               | 21             | 8.27 | 338.6       | 220         | 2                | 35               | 0.8                   | 2288         | 32.01       | 2.05        | 10.05       |
|           | 15:00 | BSK3  | 41.8         | 0.5               | 30.5           | 8.67 | 286.7       | 186         | 12               | 50               | 0.3                   | 2600         | 3.72        | 0.97        | 10.05       |
|           | 15:40 | BSK4  | 35.4         | 1.3               | 31             | 8.16 | 416.2       | 271         | 1.5              | 60               | 0.4                   | 1896         | 1.88        | 0.99        | 5.03        |
|           | 16:00 | BSK5  | 38.3         | 0.8               | 26.5           | 8.68 | 334.5       | 218         | 3                | 25               | 0.7                   | 2048         | 2.53        | 1.57        | 10.05       |
| 2016.8.17 | 16:20 | BSK6  | 40           | 0.8               | 29             | 8.56 | 381.2       | 248         | 2                | 50               | 1                     | 1728         | 1.50        | 1.29        | 20.10       |
|           | 17:00 | BSK7  | 38.1         | 0.6               | 32.3           | 8.76 | 335.2       | 218         | 2                | 10               | 0.5                   | 1984         | 1.65        | 0.86        | 5.03        |
|           | 9:30  | BSK8  | 30.2         | 0.8               | 23.3           | 8.48 | 368.9       | 240         | 11               | 15               | 0.3                   | 3112         | 1.64        | 1.55        | 10.05       |
|           | 10:00 | BSK9  | 32.3         | 0.4               | 26             | 8.4  | 362.9       | 236         | 11               | 15               | 0.3                   | 2632         | 1.72        | 1.45        | 45.23       |
|           | 11:00 | BSK10 | 34.4         | 0.2               | 29             | 8.56 | 367.4       | 239         | 20               | 35               | 0.2                   | 2368         | 1.86        | 1.29        |             |
|           | 11:24 | BSK11 | 35.5         | 2.8               | 29.1           | 8.52 | 410.8       | 207         | 5                | 50               | 1.2                   | 2544         | 1.40        | 0.71        | 5.03        |
|           | 12:45 | BSK12 | 38.5         | 1.6               | 30             | 8.46 | 474.8       | 309         | 12               | 50               | 1                     | 2904         | 1.44        | 1.33        | 40.20       |
|           | 15:00 | BYD1  | 35           | 0.3               | 29.5           | 8.45 | 663.6       | 431         | 1                | 10               | 0.1                   | 2240         | 2.25        | 2.38        | 10.05       |
|           | 16:30 | BYD2  | 32.7         | 0.8               | 30             | 8.58 | 217.6       | 142         | 4                | 10               | 0.1                   | 1808         | 4.74        | 1.03        | 5.03        |

|           |       |      |      |     |      |      |        |     |    |    |     |      |      |      |       |
|-----------|-------|------|------|-----|------|------|--------|-----|----|----|-----|------|------|------|-------|
|           | 17:45 | BYD3 | 33   | 0.5 | 29   | 8.45 | 1087.9 | 707 |    |    |     | 4488 | 2.00 | 1.62 | 15.08 |
|           | 18:14 | BYD4 | 32.6 | 0.2 | 32   | 8.55 | 1099.5 | 716 | 5  | 30 | 1.2 | 3592 | 2.49 | 1.58 | 15.08 |
|           | 17:00 | BYD5 | 32   | 0.2 | 30.5 | 8.53 | 1051.9 | 684 | 4  | 30 | 1.2 | 4080 | 1.73 | 1.26 | 5.03  |
|           | 19:30 | BQJ1 | 32.3 | 1.5 | 30   | 8.56 | 623    | 405 | 40 | 45 | 0.6 | 3784 | 1.83 | 1.43 | 15.08 |
| 2016.8.18 | 10:00 | BQJ2 | 37   | 1.2 | 29.5 | 8.35 | 396.4  | 258 |    |    |     | 2416 | 2.99 | 1.26 | 95.48 |
|           | 11:20 | BPH1 | 33.2 | 0.7 | 31.9 | 8.49 | 1350.3 | 878 |    |    |     | 3856 | 8.98 | 1.47 | 25.13 |
|           | 15:00 | BSX1 | 41.4 | 0.1 | 32   | 8.42 | 150.9  | 98  |    |    |     | 600  | 3.46 | 0.64 | 5.03  |
|           | 16:00 | BSX2 | 41.2 | 1   | 34   | 8.23 | 179.9  | 117 | 8  | 10 | 0.1 | 1424 | 3.31 | 1.33 | 30.15 |
|           | 16:30 | BQG3 | 37.1 | 0.1 | 32   | 8.43 | 422.2  | 274 | 15 | 30 | 0.5 | 2376 | 2.46 | 1.71 | 85.43 |

---
