# Supplementary material for: Gas transfer velocities of CO 2 in subtropical monsoonal climate streams and small rivers
Source: Copernicus journal article supplement (doi:10.5194/bg-2018-227), 2018-06-04
Supplement: Supplementary file [file bg-2018-227-AC3-supplement.pdf]

1 **Gas transfer velocities of CO<sub>2</sub> in subtropical monsoonal climate streams and**  
2 **small rivers**

3

4 **Siyue Li<sup>a\*</sup>, Rong Mao<sup>a</sup>, Yongmei Ma<sup>a</sup>, Vedula V. S. S. Sarma<sup>b</sup>**

5 a. Chongqing Institute of Green and Intelligent Technology, Chinese Academy of  
6 Sciences, Chongqing 400714, China

7 b. CSIR-National Institute of Oceanography, Regional Centre, Visakhapatnam, India

8

9 **Correspondence**

10 **Siyue Li**

11 *Chongqing Institute of Green and Intelligent Technology (CIGIT),*

12 *Chinese Academy of Sciences (CAS).*

13 *266, Fangzheng Avenue, Shuitu High-tech Park, Beibei, Chongqing 400714, China.*

14 *Tel: +86 23 65935058; Fax: +86 23 65935000*

15 *Email: syli2006@163.com*

16 **Abstract**

17 CO<sub>2</sub> outgassing from rivers is a critical component for evaluating riverine carbon  
18 cycle, but it is poorly quantified largely due to limited measurements and modeling of  
19 gas transfer velocity (k) in subtropical streams and rivers. We measured CO<sub>2</sub> flux  
20 rates, and calculated k and partial pressure (pCO<sub>2</sub>) in 60 river networks of the Three  
21 Gorges Reservoir (TGR) region, a typical area in the upper Yangtze River with  
22 monsoonal climate and mountainous terrain. The ~~observed-determined~~ k<sub>600</sub> values  
23 (~~k<sub>600</sub>~~=48.4±53.2 cm/h) ~~were~~ showed large variability due to spatial variations in  
24 physical controls on surface water turbulence. Our flux-derived k values  
25 ~~measurements~~ using chambers were comparable with model derived from flow  
26 velocities. Unlike in open waters, k is more pertinent to flow velocity and water depth  
27 in the studied ~~small~~ river systems. Our results show that TGR river networks emitted  
28 approx. 1.4 Tg CO<sub>2</sub>/y using varying approaches such as chambers, ~~derived~~ measured k  
29 and developed k model. This study suggests that incorporating scale-appropriate k  
30 measurements into extensive pCO<sub>2</sub> investigation is required to refine basin-wide  
31 carbon budgets in the subtropical streams and small rivers. We concluded that simple  
32 parameterization of k as a function of morphological characteristics was site specific  
33 and hence highly variable in rivers of the upper Yangtze River. k models should be  
34 developed for stream studies to evaluate the contribution of these regions to  
35 atmospheric CO<sub>2</sub>.

36

37 **Key words:** CO<sub>2</sub> outgassing, riverine C flux, flow velocity, physical controls, Three  
38 Gorge Reservoir, Yangtze River

带格式的：下标

## 39 1. Introduction

40 Rivers serve as a significant contributor of CO<sub>2</sub> to the atmosphere (Cole *et al.*,  
41 2007; Tranvik *et al.*, 2009; Li *et al.*, 2012; Raymond *et al.*, 2013). As a consequence,  
42 accurate quantification of riverine CO<sub>2</sub> emissions is a key component to estimate net  
43 continental carbon (C) flux (Raymond *et al.*, 2013). More detailed observational data  
44 and ~~new~~ accurate measurement techniques are critical to refine the riverine C budgets  
45 (Raymond and Cole, 2001; Li and Bush, 2015). Generally two methods are used to  
46 estimate CO<sub>2</sub> areal fluxes from the river system, such as direct measurements floating  
47 chambers (FCs), and indirect calculation of thin boundary layer (TBL) model that  
48 depends on gas concentration at air-water gradient and gas transfer velocity,  $k$  (Guerin  
49 *et al.*, 2007; Xiao *et al.*, 2014). Direct measurements are normally laborious, while the  
50 latter method shows ease and simplicity and thus is preferred (Butman and Raymond,  
51 2011; Li *et al.*, 2012; Li *et al.*, 2013; Lauerwald *et al.*, 2015; Ran *et al.*, 2015).

52 The areal flux of CO<sub>2</sub> ( $F$ , unit in mmol/m<sup>2</sup>/d) *via* the water–air interface by TBL  
53 is described as follows:

$$54 F = k \times K_h \times \Delta pCO_2 \quad (1)$$

$$55 K_h = 10^{-(1.11 + 0.016 * T - 0.00007 * T^2)} \quad (2)$$

56 where  $k$  (unit in m/d) is the gas transfer velocity of CO<sub>2</sub> (also referred to as piston  
57 velocity) at the *in situ* temperature (Li *et al.*, 2016).  $\Delta pCO_2$  (unit in  $\mu$ atm) is the  
58 air-water gradient of  $pCO_2$  (Borges *et al.*, 2004).  $K_h$  (mmol/m<sup>3</sup>/ $\mu$ atm) is the  
59 aqueous-phase solubility coefficient of CO<sub>2</sub> corrected using temperature ( $T$  in  $^{\circ}$ C) (Li  
60 *et al.*, 2016).

61  $\Delta p\text{CO}_2$  can be measured precisely-well in various aquatic systems, however, the  
62 accuracy of the estimation of flux is depended on the k value. Broad ranges of k for  
63  $\text{CO}_2$  (Raymond and Cole, 2001; Borges *et al.*, 2004; Raymond *et al.*, 2012) were  
64 reported due to variations in techniques, tracers used and governing processes. k is  
65 controlled by turbulence at the surface aqueous boundary layer, hence,  $k_{600}$  (the  
66 standardized gas transfer velocity at a temperature of 20 °C) is parameterized as a  
67 function of wind speed in open water systems of reservoirs, lakes, and oceans (Borges  
68 *et al.*, 2004; Guerin *et al.*, 2007; Wanninkhof *et al.*, 2009). While in streams and small  
69 rivers, turbulence at the water-air interface is generated by shear stresses at streambed,  
70 thus k is modeled using channel slope, water depth, and water velocity in particular  
71 (Alin *et al.*, 2011; Raymond *et al.*, 2012). Variable formulations of k have been  
72 established by numerous theoretical, laboratory and field studies, nonetheless, better  
73 constraint on k levels is still required as its levels are very significant and specific due  
74 to large heterogeneity in hydrodynamics and physical characteristics of river networks.  
75 This highlights the importance of k measurements in a wide range of environments  
76 for the accurate upscaling of  $\text{CO}_2$  evasion, and for parameterizing the physical  
77 controls on  $k_{600}$ . However, only few studies provide information of k for riverine  $\text{CO}_2$   
78 flux in Asia (Alin *et al.*, 2011; Ran *et al.*, 2015), and those studies do not address the  
79 variability of k in China's small rivers and streams.

80 Limited studies demonstrated that higher levels of k in the Chinese large rivers  
81 (Alin *et al.*, 2011; Ran *et al.*, 2015; Liu *et al.*, 2017; Ran *et al.*, 2017), which  
82 contributed to much higher  $\text{CO}_2$  areal flux particularly in China's monsoonal rivers

83 that are impacted by ~~concentrated seasonal precipitation~~hydrological seasonality. The  
84 monsoonal flow pattern and thus flow velocity is expected to be different than other  
85 rivers in the world, as a consequence, k levels should be different than others, and  
86 potentially is higher in subtropical monsoonal rivers.

87 Considerable efforts, such as purposeful (Jean-Baptiste and Poisson, 2000;  
88 Crusius and Wanninkhof, 2003) and natural tracers (Wanninkhof, 1992) and FCs  
89 (Borges *et al.*, 2004; Guerin *et al.*, 2007; Alin *et al.*, 2011; Prytherch *et al.*, 2017),  
90 have been carried out to estimate accurate k values. The direct determination of k by  
91 FCs is more popular due to simplicity of the technique for short-term CO<sub>2</sub> flux  
92 measurements (Raymond and Cole, 2001; Xiao *et al.*, 2014; Prytherch *et al.*, 2017).  
93 Prior reports, however, have demonstrated that k values and the parameterization of k  
94 as a function of wind and/or flow velocity (probably water depth) vary widely across  
95 rivers and streams (Raymond and Cole, 2001; Raymond *et al.*, 2012). To contribute to  
96 this debate, extensive investigation was firstly accomplished for determination of k in  
97 rivers and streams of the upper Yangtze using FC method. Models of k were further  
98 developed using hydraulic properties by flux measurements and TBL model. Our new  
99 contributions to the literature include (1) ~~providing first~~ determination and controls  
100 of k levels for small rivers and streams in subtropical areas of China, and (2)  
101 ~~comparisons of two methods for CO<sub>2</sub> areal fluxes by FCs and models developed~~new  
102 models developed in the subtropical mountainous river networks. The outcome of this  
103 study is expected to help in accurate estimation of CO<sub>2</sub> evasion from subtropical  
104 rivers and streams, and thus refine riverine C budget over a regional/basin scale.

105 Our recent study preliminarily investigated  $p\text{CO}_2$  and air – water  $\text{CO}_2$  areal flux  
106 as well as their controls from fluvial networks in the Three Gorges Reservoir (TGR)  
107 area (Li *et al.*, 2018). The past study was based on two field works, and the diffusive  
108 models from other continents were used. In this study, we attempted to derive k levels  
109 and develop the gas transfer model in this area (mountainous streams and small rivers)  
110 for more accurate quantification of  $\text{CO}_2$  areal flux, and also to serve for the fluvial  
111 networks in the Yangtze River or others with similar hydrology and geomorphology.  
112 Moreover, we did detailed field campaigns in the two contrasting rivers Daning and  
113 Qijiang for models (Fig. 1). The study thus clearly stated distinct differences than the  
114 previous study (Li *et al.*, 2018) by the new contributions of specific objectives and  
115 data supplements, as well as wider significance.

## 116

## 117 **2. Materials and methods**

### 118 **2.1. Study areas**

119 All field measurements were carried out in the rivers and streams of the Three  
120 Gorges Reservoir (TGR) region ( $28^{\circ}44'–31^{\circ}40'N$ ,  $106^{\circ}10'–111^{\circ}10'E$ ) that is locating  
121 in the upper Yangtze River, China (Fig. [1S4](#)). This region is subject to humid  
122 subtropical monsoon climate with an average annual temperature ranging between 15  
123 and  $19^{\circ}\text{C}$ . Average annual precipitation is approx. 1250 mm with large intra- and  
124 inter-annual variability. About 75% of the annual total rainfall is concentrated in April  
125 through September (Li *et al.*, 2018).

126 The river sub-catchments include large scale river networks covering the

127 majority of the tributaries of the Yangtze in the TGR region, i.e., ~~32 first-order~~  
128 ~~tributaries and 16 second-order~~48 tributaries were collected. These tributaries have  
129 drainage areas that vary widely from 100 to 4400 km<sup>2</sup> with width ranging from 1 m to  
130 less than 100 m. The annual discharges from these tributaries have a broad spectrum  
131 of 1.8 – 112 m<sup>3</sup>/s. Detailed samplings were conducted in the two largest rivers of  
132 Daning (35 sampling sites) and Qijiang (32 sites) in the TGR region. These two river  
133 basins drain catchment areas of 4200 and 4400 km<sup>2</sup> ~~with maximal third-order~~  
134 ~~tributaries~~The studied river systems had width < 100 m, we thus defined them as  
135 small rivers and streams. The Daning and Qijiang river systems are underlain by  
136 widely carbonate rock, and locating in a typical karst area. The location of sampling  
137 sites is deciphered in Fig. ~~1S1~~. The detailed information on sampling sites and  
138 primary data are presented in the Supplement Materials (Appendix Table A1). The  
139 sampling sites are outside the Reservoirs and are not affected by dam operation.

140

## 141 2.2. Water sampling and analyses

142 Three fieldwork campaigns from the main river networks in the TGR region  
143 were undertaken during May through August in 2016 (i.e., 18-22 May for Daning, 21  
144 June-2 July for the entire tributaries of TGR, and 15-18 August for Qijiang). A total  
145 of 115 discrete grab samples were collected (each sample consisteds of three  
146 replicates). Running waters were taken using pre acid-washed 5-L high density  
147 polyethylene (HDPE) plastic containers from depths of 10 cm below surface. The  
148 samples were filtered through pre-baked Whatman GF/F (0.7- $\mu$ m pore size) filters on

149 the sampling day and immediately stored in acid-washed HDPE bottles. The bottles  
150 were transported in ice box to the laboratory and stored at 4 °C for analysis.  
151 Concentrations of dissolved organic carbon (DOC), dissolved total nitrogen (DTN),  
152 and dissolved total phosphorus (DTP) were determined within 7 days of water  
153 collection (Mao *et al.*, 2017).

154 Water temperature (T), pH, DO saturation (DO%) and electrical conductivity  
155 (EC) were measured *in situ* by the calibrated multi-parameter sondes (HQ40d HACH,  
156 USA, and YSI 6600, YSI incorporated, USA). pH, the key parameter for  $p\text{CO}_2$   
157 calculation, was measured to a precision of  $\pm 0.002$ , and pH sonde ~~was~~ calibrated by  
158 the certified reference materials (CRMs) before measurements with an accuracy is  
159 better than 0.2%. Atmospheric  $\text{CO}_2$  concentrations were determined *in situ* using ~~PP~~  
160 ~~Systems~~ EGM-4 (Environmental Gas Monitor; PP SYSTEMS Corporation, USA).  
161 Total alkalinity was measured using a fixed endpoint titration method with 0.0200  
162 mol/L hydrochloric acid (HCl) on the sampling day. DOC concentration was  
163 measured using a total organic carbon analyzer (TOC-5000, Shimadzu, Japan) with a  
164 precision better than 3% (Mao *et al.*, 2017). DTN and DTP concentrations were  
165 determined using a continuous-flow autoanalyzer (AA3, Seal Analytical, Germany)  
166 and/or spectrophotometer following peroxodisulfate oxidation (Ebina *et al.*, 1983).

167 All the solvents and reagents used in experiments were of analytical-reagent grade.  
168 ~~chemical were used for all experiments.~~

170 Concomitant stream width, depth and flow velocity were determined along the



171 | cross section. Wind speed at 1 m over the water surface ( $U_1$ ) and air temperature ( $T_a$ )  
172 | were measured with a Testo 410-1 handheld anemometer (Germany). Wind speed at  
173 | 10 m height ( $U_{10}$ , unit in m/s) was calculated using the following formula (Crusius  
174 | and Wanninkhof, 2003):

$$175 \quad U_{10} = U_Z \left[ 1 + \frac{(C_{d10})^{1/2}}{K} \times \ln\left(\frac{10}{z}\right) \right] \quad (3)$$

176 | where  $C_{d10}$  is the drag coefficient at 10 m height (0.0013 m/s), and  $K$  is the von  
177 | Karman constant (0.41), and  $z$  is the height (m) of wind speed measurement. ~~The~~  
178 | ~~relationship was yielded when  $z=1$  ( $U_{10}=1.208 \times U_1$ )~~ as we measured the wind speed at  
179 | a height of 1m ( $U_1$ ).

带格式的：下标

180 | Aqueous  $p\text{CO}_2$  was computed from the measurements of pH, total alkalinity, and  
181 | water temperature using  $\text{CO}_2$  system ( $k_1$  and  $k_2$  are from Millero, 1979) (Lewis *et al.*,  
182 | 1998), which have been identified as high quality data (Borges *et al.*, 2004; Li *et al.*,  
183 | 2012; Li *et al.*, 2013).

184

### 185 | 2.3. Water-to-air $\text{CO}_2$ fluxes using FC method

186 | FCs (30 cm in diameter, 30 cm in height) were deployed to measure air-water  
187 |  $\text{CO}_2$  fluxes and transfer velocities. They were made of cylindrical polyvinyl chloride  
188 | (PVC) pipe with a volume of 21.20 L and a surface area of  $0.071 \text{ m}^2$ . These  
189 | non-transparent, thermally insulated vertical tubes, covered by aluminum foil, were  
190 | connected *via*  $\text{CO}_2$  impermeable rubber-polymer tubing (with outer and inner  
191 | diameters of 0.5 cm and 0.35 cm, respectively) to a portable non-dispersive infrared

192 CO<sub>2</sub> analyzer EGM-4 (PPSystems). Air was circulated through the EGM-4 instrument  
193 via an air filter using an integral ~~DC~~ pump at a flow rate of 350 ml/min. The chamber  
194 method was widely used and more details of advantages and limits on chambers were  
195 reviewed elsewhere (Borges *et al.*, 2004; Alin *et al.*, 2011; Xiao *et al.*, 2014).

196 Chamber measurements were conducted by deploying two replicate chambers or  
197 one chamber for two times at each site. In sampling sites with low and favorable flow  
198 conditions (Fig. S1), freely drifting chambers (DCs) were executed, while sampling  
199 sites in rivers and streams with higher flow velocity were conducted with anchored  
200 chambers (ACs) (Ran *et al.*, 2017). ACs would create overestimation of CO<sub>2</sub>  
201 emissions in our studied region (Lorke *et al.*, 2015). Data were logged automatically  
202 and continuously at 1-min interval over a given span of time (normally 5-10 minutes)  
203 after enclosure. The CO<sub>2</sub> area flux (mg/m<sup>2</sup>/h) was calculated using the following  
204 formula.

$$205 \quad F = 60 \times \frac{dp_{CO_2} \times M \times P \times T_0}{dt \times V_0 \times P_0 \times T} H \quad (4)$$

206 Where  $dp_{CO_2}/dt$  is the rate of concentration change in FCs ( $\mu\text{l}/\text{min}$ ); M is the  
207 molar mass of CO<sub>2</sub> (g/mol); P is the atmosphere pressure of the sampling site (Pa); T  
208 is the chamber absolute temperature of the sampling time (K); V<sub>0</sub>, P<sub>0</sub>, T<sub>0</sub> is the molar  
209 volume (22.4 l/mol), P<sub>0</sub> is atmosphere pressure (101325 Pa), and T<sub>0</sub> is absolute  
210 temperature (273.15 K) –under the standard condition; H is the chamber height above  
211 the water surface (m) (Alin *et al.*, 2011). We accepted the flux data that had a good  
212 linear regression of flux against time ( $R^2 \geq 0.95$ ,  $p < 0.01$ ) following manufacturer?  
213 specification. In our sampling points, all measured fluxes were retained since the

带格式的: Default, 缩进: 首行缩进: 2 字符, 定义网格后自动调整右缩进, 调整中文与西文文字的间距, 调整中文与数字的间距

214 floating chambers yielded linearly increasing CO<sub>2</sub> against time.

215 Water samples from a total of 115 sites were collected. Floating chambers with  
216 replicates were deployed in 101 sites (32 sampling sites in Daning, 37 sites in TGR  
217 river networks and 32 sites in Qijiang). The sampling period covered spring and  
218 summer season, our sampling points are reasonable considering a water area of 433  
219 km<sup>2</sup>. For example, 16 sites were collected for Yangtze system to examine  
220 hydrological and geomorphological controls on pCO<sub>2</sub> (Liu *et al.*, 2017), and 17 sites  
221 for dynamic biogeochemical controls on riverine pCO<sub>2</sub> in the Yangtze basin (Liu *et*  
222 *al.*, 2016). Similar to other studies, sampling and flux measurements in the day would  
223 tend to underestimate CO<sub>2</sub> evasion rate (Bodmer *et al.*, 2016).

带格式的：下标

#### 225 **2.4. Calculations of the gas transfer velocity**

226 The k was ~~computed with~~ calculated by reorganizing Eeq (1). To make comparisons, k  
227 is normalized to a Schmidt (Sc) number of 600 (k<sub>600</sub>) at a temperature of 20 °C.

$$228 \quad k_{600} = k_T \left( \frac{600}{S_{CT}} \right)^{-0.5} \quad (5)$$

$$229 \quad S_{CT} = 1911.1 - 118.11T + 3.4527T^2 - 0.04132T^3 \quad (5)$$

230 Where k<sub>T</sub> is the measured values at the *in situ* temperature (T, unit in °C), S<sub>CT</sub> is the  
231 Schmidt number of temperature T. Dependency of ~~k proportional to Sc<sup>-0.5</sup>~~ -0.5 was  
232 employed here as measurement were made in ~~highly~~ turbulent rivers and streams in  
233 this study (Wanninkhof, 1992; Borges *et al.*, 2004; Alin *et al.*, 2011).

#### 235 **2.5. Estimation of river water area**

236 Water surface is an important parameter for CO<sub>2</sub> efflux estimation, while it  
237 depends on its climate, channel geometry and topography. River water area therefore  
238 largely fluctuates with much higher areal extent of water surface particularly in  
239 monsoonal season. However, most studies do not consider this change, and a fraction  
240 of the drainage area is used in river water area calculation (Zhang *et al.*, 2017). In our  
241 study, a 90 m resolution SRTM DEM (Shuttle Radar Topography Mission digital  
242 elevation model) data and Landsat images in dry season were used to delineate river  
243 network, and thus water area (Zhang *et al.*, 2018), whilst, stream orders were not  
244 extracted. Water area of river systems is generally much higher in monsoonal season  
245 in comparison to dry season, for instance, Yellow River showed 1.4-fold higher water  
246 area in the wet season than in the dry season (Ran *et al.*, 2015). Available dry-season  
247 image was likely to underestimate CO<sub>2</sub> estimation.

带格式的：下标

## 249 **2.65. Data processing**

250 Prior to statistical analysis, we excluded  $k_{600}$  data for samples with the air-water  
251  $p\text{CO}_2$  gradient  $<110 \mu\text{atm}$ , since the error in the  $k_{600}$  calculations drastically enhances  
252 when  $\Delta p\text{CO}_2$  approaches zero (Borges *et al.*, 2004; Alin *et al.*, 2011), and datasets  
253 with  $\Delta p\text{CO}_2 >110 \mu\text{atm}$  provide an error of  $<10\%$  on  $k_{600}$  computation. Thus, we  
254 discarded the samples (36.7% of sampling points with flux measurements) with  
255  $\Delta p\text{CO}_2 <110 \mu\text{atm}$  for  $k_{600}$  model development, while for the flux estimations from  
256 diffusive model and floating chambers, all samples were included.

257 Spatial differences (Daning, Qijiang and entire tributaries of TGR region) were

258 tested using the nonparametric Mann Whitney U-test. Multivariate statistics, such as  
259 correlation and stepwise multiple linear regression, were performed for the models of  
260  $k_{600}$  using potential physical parameters, ~~such as of~~ wind speed, water depth, and  
261 current velocity as the independent variables from both separated data and combined  
262 data (Alin *et al.*, 2011). k models were obtained by water depth using data from the  
263 TGR rivers, while by flow velocity in the Qijiang. All statistical relationships were  
264 significant at  $p < 0.05$ . The statistical processes were conducted using SigmaPlot 11.0  
265 and SPSS 16.0 for Windows (Li *et al.*, 2009; Li *et al.*, 2016).

266

### 267 3. Results

#### 268 3.1. CO<sub>2</sub> partial pressure and key water quality variables

269 The significant spatial variations in water temperature, pH,  $p\text{CO}_2$ , DOC and  
270 nutrients (DTN and DTP) were observed among Daning, TGR and Qijiang rivers  
271 whereas alkalinity did not display such variability (Fig. S2). pH varied from 7.47 to  
272 8.76 9.38 (mean of  $8.39 \pm 0.29$ ) with exceptions of two quite high values of 9.38 and  
273 8.87 (mean:  $8.39 \pm 0.29$  from total dataset). ~~and~~ Much lower pH was observed in TGR  
274 rivers ( $8.21 \pm 0.33$ ) (Table 1;  $p < 0.05$ ; Fig. S2).  $p\text{CO}_2$  varied between 50 and 4830  
275  $\mu\text{atm}$  with mean of  $846 \pm 819 \mu\text{atm}$  (Table 1). There were 28.7% of samples that had  
276  $p\text{CO}_2$  levels lower than  $410 \mu\text{atm}$ . ~~, suggesting that all three~~ while the studied rivers  
277 were overall supersaturated with reference to atmospheric CO<sub>2</sub> and act as a source  
278 for the atmospheric CO<sub>2</sub>. The  $p\text{CO}_2$  levels were 2.1 to 2.6-fold higher in TGR rivers  
279 than Daning ( $483 \pm 294 \mu\text{atm}$ ) and Qijiang Rivers ( $614 \pm 316 \mu\text{atm}$ ) (Fig. S2). ~~The~~

域代码已更改

带格式的: 字体: (默认) Times  
New Roman, 小四, 非加粗

280 ~~calculated  $p\text{CO}_2$  levels were within the published range, but towards the lower end of~~  
281 ~~published concentrations compiled elsewhere (Cole and Caraco, 2001; Li *et al.*, 2013).~~  
282 ~~The total mean  $p\text{CO}_2$  (846  $\mu\text{atm}$ ) in the TGR, Danning and Qijiang sampled is lower~~  
283 ~~than one third of global river's average (3220  $\mu\text{atm}$ ) (Cole and Caraco, 2001).~~

284  
285 The much higher concentrations of dissolved organic carbon (DOC) and  
286 dissolved nutrients (DTN and DTP) (Fig. S3) were observed in the TGR rivers  
287 ( $p < 0.01$  by Mann-Whitney Rank Sum Test; Fig. S3) than Qijiang and Danning. In  
288 comparison to Daning, Qijiang showed significantly ~~Relatively~~ higher  
289 concentrations of DOC and DTN ( $p < 0.05$ ), and much lower  ~~were observed in~~  
290 Qijiang than Daning River but mean ~~TDP concentration was much higher in latter than~~  
291 former river ( $p < 0.05$ ; Fig. S3; Table 1).

### 293 3.2. $\text{CO}_2$ flux using floating chambers

294 The calculated  $\text{CO}_2$  areal fluxes were higher in TGR rivers ( $217.7 \pm 334.7$   
295  $\text{mmol/m}^2/\text{d}$ ,  $n = 35$ ), followed by Daning ( $122.0 \pm 239.4 \text{ mmol/m}^2/\text{d}$ ,  $n = 28$ ) and  
296 Qijiang rivers ( $50.3 \pm 177.2 \text{ mmol/m}^2/\text{d}$ ,  $n = 32$ ) (Fig. 24). The higher  $\text{CO}_2$  evasion  
297 from the TGR rivers is consistent with high riverine  $p\text{CO}_2$  levels. The mean  $\text{CO}_2$   
298 emission rate was  $133.1 \pm 269.1 \text{ mmol/m}^2/\text{d}$  ( $n = 95$ ) in all three rivers sampled. The  
299 mean  $\text{CO}_2$  flux differed significantly between TGR rivers and Qijiang (Fig. 24). ~~The~~  
300 ~~ratio of mean to median of  $\text{CO}_2$  areal flux ranged between 1.4 (Qijiang) and 2.6 (TGR~~  
301 ~~rivers).~~

302

### 303 3.3. k levels

304 ~~Samples with  $\Delta p\text{CO}_2$  less than 110  $\mu\text{atm}$  were excluded for  $k_{600}$  calculations, thus~~  
305 ~~a~~ total of 64 data were used (10 for Daning River, 33 for TGR rivers and 21 for  
306 Qijiang River) to develop k model after removal of samples with  $\Delta p\text{CO}_2$  less than 110  
307  $\mu\text{atm}$  (Table 2). No significant variability in  $k_{600}$  values were observed among the  
308 three rivers sampled (Fig. 32). The mean  $k_{600}$  (unit in cm/h) ~~was~~ relatively higher in  
309 Qijiang ( $60.2 \pm 78.9$ ), followed by Daning ( $50.2 \pm 20.1$ ) and TGR rivers ( $40.4 \pm 37.6$ ),  
310 while the median  $k_{600}$  (unit in cm/h) was higher in Daning (50.5), followed by TGR  
311 rivers (30.0) and Qijiang (25.8) (Fig. 32; Table S1). ~~Combined Binned~~  $k_{600}$  data were  
312 averaged to  $48.4 \pm 53.2$  cm/h (95% CI: 35.1-61.7), and it is 1.5-fold higher than the  
313 median value (32.2 cm/h) (Fig. 32).

带格式的：下标

314

## 315 4. Discussion

### 316 4.1. Determined k values relative to world rivers

带格式的

317 We derived first-time the k values in the subtropical streams and small rivers.  
318 Our ~~determined~~ ~~measured~~  $k_{600}$  levels with a 95% CI of 35.1 to 61.7 (mean: 48.4) cm/h  
319 is compared well with a compilation of data for streams and small rivers (e.g., 3-70  
320 cm/h) (Raymond *et al.*, 2012). Our determined  $k_{600}$  values are greater than the global  
321 rivers' average (8 - 33 cm/h) (Butman and Raymond, 2011; Raymond *et al.*, 2013),  
322 and much higher than mean for tropical and temperate large rivers (5-31 cm/h) (Alin  
323 *et al.*, 2011). These studies evidences that  $k_{600}$  values are highly variable in streams

带格式的：下标

324 and small rivers (Alin *et al.*, 2011; Ran *et al.*, 2015). Though the mean  $k_{600}$  in the  
325 TGR, Daning and Qijiang is higher than global mean, however, it is consistent with  
326  $k_{600}$  values in the main stream and river networks of the turbulent Yellow River ( $42 \pm$   
327  $17$  cm/h) (Ran *et al.*, 2015), and Yangtze ( $38 \pm 40$  cm/h) (Liu *et al.*, 2017) (Table S2).

328 The calculated  $pCO_2$  levels were within the published range, but towards the  
329 lower-end of published concentrations compiled elsewhere (Cole and Caraco, 2001;  
330 Li *et al.*, 2013). The total mean  $pCO_2$  ( $846 \pm 819$   $\mu$ atm) in the TGR, Danning and  
331 Qijiang sampled ~~was~~ is lower than one third of global river's average ( $3220$   $\mu$ atm)  
332 (Cole and Caraco, 2001). The lower  $pCO_2$  than most of the world's river systems,  
333 particularly the under-saturated values, demonstrated that heterotrophic respiration of  
334 terrestrially derived DOC was not significant. Compared with high alkalinity, the  
335 limited delivery DOC particularly in the Daning and Qijiang river systems (Figs. S2  
336 and S3) also indicated that in-stream respiration was limited. These two river systems  
337 are characterized by karst terrain and underlain by carbonate rock, where  
338 photosynthetic uptake of dissolved  $CO_2$  and carbonate minerals dissolution  
339 considerably regulated aquatic  $pCO_2$  (Zhang *et al.*, 2017).

340 Higher pH levels were observed in Daning and Qijiang river systems ( $p < 0.05$  by  
341 Mann-Whitney Rank Sum Test), where more carbonate rock exists that are  
342 characterized by karst terrain. Our pH range was comparable to the recent study on  
343 the karst river in China (Zhang *et al.*, 2017). Quite high values (i.e., 9.38 and 8.87)  
344 were recorded in some investigated sites, where chemical enhancement would  
345 increase the influx of atmospheric  $CO_2$  to alkaline waters (Wanninkhof and Knox,

带格式的：下标

带格式的：下标

域代码已更改

带格式的：字体：(默认) Times New Roman, 非突出显示

带格式的：下标

带格式的：定义网格后自动调整右缩进，调整中文与西文文字的间距，调整中文与数字的间距



1996), while 1.7% of sampling sites that were strongly affected by chemical enhancement were not significant on a regional scale. This chemical enhancement of CO<sub>2</sub> influx was also reported to be limited in high-pH rivers (Zhang *et al.*, 2017).

带格式的: 字体: (默认) Times New Roman

#### 4.2. Hydraulic controls of $k_{600}$

带格式的: 缩进: 首行缩进: 0 厘米

带格式的: 下标

带格式的: 下标

It has been well established that  $k_{600}$  is governed by a multitude of physical factors particularly current velocity, wind speed, stream slope and water depth, of which, wind speed is the dominant factor of  $k$  in open waters such as large rivers and estuaries (Raymond and Cole, 2001; Crusius and Wanninkhof, 2003; Borges *et al.*, 2004; Alin *et al.*, 2011). In contrast  $k_{600}$  in small rivers and streams is closely linked to flow velocity, water depth and channel slope (Alin *et al.*, 2011; Raymond *et al.*, 2012).

带格式的: 下标

Several studies reported that the combined contribution of flow velocity and wind speed to  $k$  is significant in the large rivers (Beaulieu *et al.*, 2012; Ran *et al.*, 2015).

Thus,  $k_{600}$  values are higher in the Yellow River (ca. 0-120 cm/h) as compared to the low-gradient River Mekong (0-60 cm/h) (Alin *et al.*, 2011; Ran *et al.*, 2015), due to higher ~~wind speed and~~ flow velocity in the Yellow River (1.8 m/s) than Mekong river (0.9±0.4 m/s), resulting in greater surface turbulence and higher  $k_{600}$  level in the

带格式的: 下标

带格式的: 下标

Yellow (42 ± 17 cm/h) than Mekong river (15 ± 9 cm/h). This could substantiate the higher  $k_{600}$  levels and spatial changes in  $k_{600}$  values of our three river systems. For instance, similar to other turbulent rivers in China (Ran *et al.*, 2015; Ran *et al.*, 2017).

带格式的: 下标

带格式的: 下标

~~The higher~~  $k_{600}$  values in the TGR, Daning and Qjiang rivers ~~were~~ due to mountainous terrain catchment, high current velocity (10 – 150 cm/s) (Fig. 43b),

带格式的: 下标

368 | bottom roughness, and shallow water depth (10 - 150 cm) (Fig. 43a). It has been  
369 | suggested that shallow water enhances bottom shear, and the resultant turbulence  
370 | increases k values (Alin *et al.*, 2011; Raymond *et al.*, 2012). These physical controls  
371 | are highly variable across environmental types (Figs. 43a and 43b), hence, k values  
372 | are expected to vary widely (Fig. 32). The  $k_{600}$  values in the TGR rivers showed wider  
373 | range (1-177 cm/h; Fig. 32; Table S1), spanning more than 2 orders of magnitude  
374 | across the region, and it is consistent with the considerable variability in the physical  
375 | processes on water turbulence across environmental settings. Similar broad range of  
376 |  $k_{600}$  levels was also observed in the China's Yellow basin (ca. 0-123 cm/h) (Ran *et al.*,  
377 | 2015; Ran *et al.*, 2017).

378 | Contrary to our expectations, no significant relationship was observed between  
379 |  $k_{600}$  and water depth, and current velocity using the entire data in the three (TGR,  
380 | Danning and Qjiang) river systems (Fig. S45). There were not statistically significant  
381 | relationships between  $k_{600}$  and wind speed using separated data or combined data, and  
382 | it is consistent with earlier studies (Alin *et al.*, 2011; Raymond *et al.*, 2012). Flow  
383 | velocity showed linear relation with  $k_{600}$ , and the extremely high value of  $k_{600}$  was  
384 | observed during the periods of higher flow velocity (Fig. S45a) using combined data.  
385 | Similar trend was also observed between water depth and  $k_{600}$  values (Fig. S45b). The  
386 | lack of strong correlation between  $k_{600}$  and physical factors are probably due to  
387 | combined effect of both flow velocity and water depth, as well as large diversity of  
388 | channel morphology, both across and within river networks in the entire catchment  
389 | (60, 000 km<sup>2</sup>). This is further collaborated by weak correlations between  $k_{600}$  and flow

带格式的：下标

带格式的：下标

带格式的：下标

带格式的：下标

带格式的：下标

带格式的：下标

带格式的：下标

390 velocity in the TGR rivers (Fig. 43), where one or two samples were taken for a large  
391 scale examination.  $k_{600}$  as a function of water depth was obtained in the TGR rivers,  
392 but it explained only 30% of the variance in  $k_{600}$ . However, model using data from  
393 Qi Jiang could explain 68% of the variance in  $k_{600}$  (Fig. 43b), and it was in line with  
394 general theory. Nonetheless,  $k_{600}$  from our flow velocity based model (Fig. 43b) ~~is-~~  
395 was potentially largely overestimated with consideration of other measurements (Alin  
396 *et al.*, 2015; Ran *et al.*, 2015; Ran *et al.*, 2017). When several extremely values ~~are-~~  
397 were removed,  $k_{600}$  (cm/h) ~~is-was~~ parameterized as follows ( $k_{600} = 62.879FV + 6.8357$ ,  
398  $R^2 = 0.52$ ,  $p = 0.019$ , FV-flow velocity with a unit of m/s), and this revised model ~~is-~~  
399 was in good agreement with the model in the river networks of the Yellow River (Ran  
400 *et al.*, 2017), but much lower than the model developed in the Yangtze system (Liu *et*  
401 *al.*, 2017) (Fig. 43c). This ~~is-was~~ reasonable because of  $k_{600}$  values in the Yangtze  
402 system ~~are-were~~ from large rivers with higher turbulence than Yellow and our studied  
403 rivers. Furthermore, the ~~measured-determined~~  $k_{600}$  using FCs was, on average,  
404 consistent with the revised model (Table 2). These differences in relationship between  
405 spatial changes in  $k_{600}$  values and physical characteristics further corroborated  
406 heterogeneity of channel geomorphology and hydraulic conditions across the  
407 investigated rivers.

408 The subtropical streams and small rivers are biologically more active and are  
409 recognized to exert higher  $CO_2$  areal flux to the atmosphere, however, their  
410 contribution to riverine carbon cycling is still poorly quantified because of data  
411 paucity and the absence of  $k$  in particular. Larger uncertainty of riverine  $CO_2$  emission

带格式的：下标

带格式的：下标

带格式的：下标

带格式的：下标

412 in China was anticipated by use of  $k_{600}$  from other continents or climate zones. For  
413 instance,  $k_{600}$  for CO<sub>2</sub> emission from tributaries in the Yellow River and karst rivers  
414 was originated from the model in the Mekong (Zhang *et al.*, 2017), and Pearl (Yao *et*  
415 *al.*, 2007), Longchuan (Li *et al.*, 2012), and Metropolitan rivers (Wang *et al.*, 2017),  
416 which are mostly from temperate regions. Our  $k_{600}$  values will therefore largely  
417 improve the estimation of CO<sub>2</sub> evasion from subtropical streams and small rivers, and  
418 improve to refine riverine carbon budget. More studies, however, are clearly needed  
419 to build the model, based on flow velocity and slope/water depth given the difficulty  
420 in k quantification on a large scale.

带格式的：下标

421

### 422 **4.3. Implications for large scale estimation**

423 We compared CO<sub>2</sub> areal flux by FCs and models developed here (Fig. ~~43~~) and  
424 other studies (Alin *et al.*, 2011) (Tables 2 and 3). CO<sub>2</sub> evasion was estimated for rivers  
425 in China with k values ranged between 8 and 15 cm/h (Yao *et al.*, 2007; Wang *et al.*,  
426 2011; Li *et al.*, 2012) (Table S2). These estimates of CO<sub>2</sub> evasion rate were  
427 considerably lower than using present  $k_{600}$  values ( $48.4 \pm 53.2$  cm/h). For instance, CO<sub>2</sub>  
428 emission rates in the Longchuan River (e.g.,  $k=8$  cm/h) and Pearl River tributaries  
429 (e.g.,  $k=8-15$  cm/h) were 3 to 6 times higher using present k values compared to  
430 earlier. We found that the determined  $k_{600}$  average was marginally beyond the levels  
431 from water depth based model and the model developed by Alin et al (Alin *et al.*,  
432 2011), while equivalent to the flow velocity based revised model, resulting in similar  
433 patterns of CO<sub>2</sub> emission rates (Table 2). Hence selection of k values would

带格式的：下标

434 significantly hamper the accuracy of the flux estimation. Therefore k must be  
435 estimated along with  $p\text{CO}_2$  measurements to accurate flux estimations.

436 We used our measured  $\text{CO}_2$  emission rates by FCs for upscaling flux estimates  
437 and it was found to be  $1.39 \text{ TgCO}_2/\text{y}$  for all rivers sampled in our study (Table 3a).  
438 The estimated emission was close to that of the revised model ( $1.40 \pm 1.31$  (95%  
439 confidence interval: 0.91-1.87)  $\text{Tg CO}_2/\text{y}$ ), and using the determined k average, i.e.,  
440  $1.37 \pm 1.28$  (95% confidence interval: 0.89-1.84)  $\text{Tg CO}_2/\text{y}$ , but slightly higher than  
441 the estimation using water-depth based model ( $1.08 \pm 1.01 \text{ Tg CO}_2/\text{y}$ ) and Alin's  
442 model ( $1.06 \pm 1.00 \text{ Tg CO}_2/\text{y}$ ) (Table 3b). The estimate was within the range of our  
443 earlier work using TBL on the TGR river networks ( $0.64\text{-}2.33 \text{ Tg CO}_2/\text{y}$ ) (Li *et al.*,  
444 2018). The higher emission, i.e.,  $3.29 \pm 3.08$  ( $2.15\text{-}4.43$ )  $\text{Tg CO}_2/\text{y}$ , using flow  
445 velocity based model may be over-estimated (Table 3b). Therefore, this study  
446 suggests that  $\text{CO}_2$  emissions from rivers and streams in this area may be  
447 underestimated, i.e.,  $0.03 \text{ Tg CO}_2/\text{y}$  (Li *et al.*, 2017) and  $0.37\text{-}0.44 \text{ Tg CO}_2/\text{y}$  (Yang *et*  
448 *al.*, 2013) as the former used TBL model with a lower k level, and the latter employed  
449 floating chambers, but they both sampled very limited tributaries (i.e., 2-3 rivers).  
450 Therefore, measurements of k must be made mandatory along with  $p\text{CO}_2$   
451 measurement in the river and stream studies.

452

#### 453 **4.4. Uncertainty assessment of $p\text{CO}_2$ and flux-derived $k_{600}$ values**

454 The uncertainty of flux-derived k values mainly stem from  $\Delta p\text{CO}_2$  (unit in ppm)  
455 and flux measurements (Lorke *et al.*, 2015; Bodmer *et al.*, 2016; Golub *et al.*, 2017).

带格式的：下标

456 Thus we provided uncertainty assessments caused by dominant sources of uncertainty  
457 from measurements of aquatic  $p\text{CO}_2$  and  $\text{CO}_2$  areal flux since uncertainty of  
458 atmospheric  $\text{CO}_2$  measurement could be neglected.

459 In our study, aquatic  $p\text{CO}_2$  was computed based on pH, alkalinity and water  
460 temperature rather than directly measured. Recent studies highlighted  $p\text{CO}_2$   
461 uncertainty caused by systematic errors over empiric random errors (Golub *et al.*,  
462 2017). Systematic errors are mainly attributed to instrument limitations, i.e., sondes of  
463 pH and water temperature. The relative accuracy of temperature meters was  $\pm 0.1$  °C  
464 according to manufacturers' specifications, thus the uncertainty of water T propagated  
465 on uncertainty in  $p\text{CO}_2$  was minor (Golub *et al.*, 2017). Systematic errors therefore  
466 stem from pH, which has been proved to be a key parameter for biased  $p\text{CO}_2$   
467 estimation calculated from aquatic carbon system (Li *et al.*, 2013; Abril *et al.*, 2015).  
468 We used a high accuracy of pH electrode and the pH meters were carefully calibrated  
469 using CRMs, and *in situ* measurements showed an uncertainty of  $\pm 0.01$ . We then run  
470 an uncertainty of  $\pm 0.01$  pH to quantify the  $p\text{CO}_2$  uncertainty, and an uncertainty of  $\pm 3\%$   
471 was observed. Systematic errors thus seemed to show little effects on  $p\text{CO}_2$  errors in  
472 our study.

473 Random errors are from repeatability of carbonate measurements. Two replicates  
474 for each sample showed the uncertainty of within  $\pm 5\%$ , indicating that uncertainty in  
475  $p\text{CO}_2$  calculation from alkalinity measurements could be minor.

476 The measured pH ranges also exhibited great effects on  $p\text{CO}_2$  uncertainty (Hunt  
477 *et al.*, 2011; Abril *et al.*, 2015). At low pH,  $p\text{CO}_2$  can be overestimated when

带格式的：字体：小四，倾斜，字  
体颜色：黑色

478 calculated from pH and alkalinity (Abril *et al.*, 2015). Samples for CO<sub>2</sub> fluxes  
479 estimated from pH and alkalinity showed pH average of 8.39±0.29 (median 8.46 with  
480 quartiles of 8.24-8.56) (n=115). Thus, overestimation of calculated CO<sub>2</sub> areal flux  
481 from pH and alkalinity is likely to be minor. Further, contribution of organic matter to  
482 non-carbonate alkalinity is likely to be neglected because of low DOC (mean 6.67  
483 mg/L; median 2.51 mg/L) (Hunt *et al.*, 2011; Li *et al.*, 2013).

484 Recent study reported fundamental differences in CO<sub>2</sub> emission rates between  
485 ACs and freely DFs (Lorke *et al.*, 2015), i.e., ACs biased the gas areal flux higher.  
486 However, some studies observed that ACs showed reasonable agreement with other  
487 flux measurement techniques (Galfalk *et al.*, 2013), and this straightforward,  
488 inexpensive and relatively simple method AC was widely used (Ran *et al.*, 2017).  
489 Water-air interface CO<sub>2</sub> flux measurements were primarily made using ACs in our  
490 studied streams and small rivers because of relatively high current velocity; otherwise,  
491 floating chambers will travel far during the measurement period. In addition,  
492 inflatable rings were used for sealing the chamber headspace and submergence of  
493 ACs was minimal, therefore, our measurements were potentially overestimated but  
494 reasonable.

495 Sampling seasonality considerably regulated riverine pCO<sub>2</sub> and gas transfer  
496 velocity and thus water-air interface CO<sub>2</sub> evasion rate (Li *et al.*, 2012; Ran *et al.*,  
497 2015). We sampled waters in wet season due to that it showed wider range of flow  
498 velocity and thus it covered the k<sub>600</sub> levels in the whole hydrological season. Wet  
499 season generally had higher current velocity and thus higher gas transfer velocity

带格式的：首行缩进：2 字符，定义网格后不调整右缩进，不调整西文与中文之间的空格，不调整中文和数字之间的空格

带格式的：下标

500 (Ran *et al.*, 2015), while aquatic  $p\text{CO}_2$  was variable with seasonality. We recently  
501 reported that riverine  $p\text{CO}_2$  in the wet season was 81% the level in the dry season (Li  
502 *et al.*, 2018), and prior study on the Yellow River reported that k level in the wet  
503 season was 1.8-fold higher than in the dry season (Ran *et al.*, 2015), while another  
504 study on the Wuding River demonstrated that k level in the wet season was 83%-130%  
505 of that in the dry season (Ran *et al.*, 2017). Thus, we acknowledged a certain amount  
506 of errors on the annual flux estimation from one-time sampling campaign during the  
507 wet season in the TGR area, while this uncertainty could not be significant because  
508 that the diluted  $p\text{CO}_2$  could alleviate the potentially increased k level in the wet  
509 season.

510

## 511 **5. Conclusion**

512 We provided first determination of gas transfer velocity ( $k$ ) in the subtropical  
513 streams and small rivers. High variability in  $k$  values (mean  $48.4 \pm 53.2$  cm/h) was  
514 observed, reflecting the variability of morphological characteristics on water  
515 turbulence both within and across river networks. ~~The determined  $k$  using floating~~  
516 ~~chambers (FCs) was comparable to our newly water depth-based model, while~~  
517 ~~substantially lower than flow velocity-based model.~~ We highlighted that  $k$  estimate  
518 from empirical model should be pursued with caution and the significance of  
519 incorporating  $k$  measurements along with extensive  $p\text{CO}_2$  investigation is highly  
520 essential for upscaling to watershed/regional scale carbon (C) budget.

521 Riverine  $p\text{CO}_2$  and  $\text{CO}_2$  areal flux showed pronounced spatial variability with



522 much higher levels in the TGR rivers. The CO<sub>2</sub> areal flux was averaged at 133.1 ±  
523 269.1 mmol/m<sup>2</sup>/d using FCs, the resulting emission was around 1.39 Tg CO<sub>2</sub>/y,  
524 similar to the scaling up emission with the determined k, and the revised flow velocity  
525 based model, while marginally above the water depth based model. More work is  
526 clearly needed to refine the k modeling [in the river systems of the upper Yangtze](#)  
527 [River](#) for evaluating regional C budgets.

528

### 529 **Acknowledgements**

530 This study was funded by “the Hundred-Talent Program” of the Chinese Academy of  
531 Sciences (R53A362Z10; granted to Dr. Li), and the National Natural Science  
532 Foundation of China (Grant No. 31670473). We are grateful to Mrs. Maofei Ni and  
533 Tianyang Li, and Miss Jing Zhang for their assistance in the field works. Users can  
534 access the original data from an Appendix. [Special thanks are given to editor and](#)  
535 [anonymous reviewers for improving the Ms.](#)

536 **References**

- 537 Abril, G., Bouillon, S., Darchambeau, F., Teodoru, C.R., Marwick, T.R., Tamooh, F., Omengo, F.O.,  
538 Geeraert, N., Deirmendjian, L., Polsenaere, P., Borges, A.V., 2015. Technical Note: Large overestimation  
539 of pCO<sub>2</sub> calculated from pH and alkalinity in acidic, organic-rich freshwaters. *Biogeosciences* 12,  
540 67-78.
- 541 Alin, S.R., Maria, D.F.F.L.R., Salimon, C.I., Richey, J.E., Holtgrieve, G.W., Krusche, A.V., Snidvongs, A.,  
542 2015. Physical controls on carbon dioxide transfer velocity and flux in low - gradient river systems and  
543 implications for regional carbon budgets. *Journal of Geophysical Research Biogeosciences* 116,  
544 248-255.
- 545 Alin, S.R., Rasera, M., Salimon, C.I., Richey, J.E., Holtgrieve, G.W., Krusche, A.V., Snidvongs, A., 2011.  
546 Physical controls on carbon dioxide transfer velocity and flux in low-gradient river systems and  
547 implications for regional carbon budgets. *Journal of Geophysical Research-Biogeosciences* 116.
- 548 Beaulieu, J.J., Shuster, W.D., Rebholz, J.A., 2012. Controls on gas transfer velocities in a large river.  
549 *Journal of Geophysical Research-Biogeosciences* 117.
- 550 Bodmer, P., Heinz, M., Pusch, M., Singer, G., Premke, K., 2016. Carbon dynamics and their link to  
551 dissolved organic matter quality across contrasting stream ecosystems. *Science of the Total*  
552 *Environment* 553, 574-586.
- 553 Borges, A.V., Delille, B., Schiettecatte, L.S., Gazeau, F., Abril, G., Frankignoulle, M., 2004. Gas transfer  
554 velocities of CO<sub>2</sub> in three European estuaries (Randers Fjord, Scheldt, and Thames). *Limnology and*  
555 *Oceanography* 49, 1630-1641.
- 556 Butman, D., Raymond, P.A., 2011. Significant efflux of carbon dioxide from streams and rivers in the  
557 United States. *Nature Geoscience* 4, 839-842.
- 558 Cole, J.J., Caraco, N.F., 2001. Carbon in catchments: connecting terrestrial carbon losses with aquatic  
559 metabolism. *Marine and Freshwater Research* 52, 101-110.
- 560 Cole, J.J., Prairie, Y.T., Caraco, N.F., McDowell, W.H., Tranvik, L.J., Striegl, R.G., Duarte, C.M., Kortelainen,  
561 P., Downing, J.A., Middelburg, J.J., Melack, J., 2007. Plumbing the Global Carbon Cycle: Integrating  
562 Inland Waters into the Terrestrial Carbon Budget. *Ecosystems* 10, 172-185.
- 563 Crusius, J., Wanninkhof, R., 2003. Gas transfer velocities measured at low wind speed over a lake.  
564 *Limnology and Oceanography* 48, 1010-1017.
- 565 Ebina, J., Tsutsui, T., Shirai, T., 1983. SIMULTANEOUS DETERMINATION OF TOTAL NITROGEN AND TOTAL  
566 PHOSPHORUS IN WATER USING PEROXODISULFATE OXIDATION. *Water Research* 17, 1721-1726.
- 567 Galfalk, M., Bastviken, D., Fredriksson, S.T., Arneborg, L., 2013. Determination of the piston velocity for  
568 water-air interfaces using flux chambers, acoustic Doppler velocimetry, and IR imaging of the water  
569 surface. *Journal of Geophysical Research-Biogeosciences* 118, 770-782.
- 570 Golub, M., Desai, A.R., McKinley, G.A., Remucal, C.K., Stanley, E.H., 2017. Large Uncertainty in  
571 Estimating p  
572 CO<sub>2</sub>  
573 From Carbonate Equilibria in Lakes. *Journal of Geophysical Research: Biogeosciences* 122, 2909-2924.
- 574 Guerin, F., Abril, G., Serca, D., Delon, C., Richard, S., Delmas, R., Tremblay, A., Varfalvy, L., 2007. Gas  
575 transfer velocities of CO<sub>2</sub> and CH<sub>4</sub> in a tropical reservoir and its river downstream. *Journal of Marine*  
576 *Systems* 66, 161-172.
- 577 Hunt, C.W., Salisbury, J.E., Vandemark, D., 2011. Contribution of non-carbonate anions to total  
578 alkalinity and overestimation of *p*CO<sub>2</sub> in New England and New Brunswick rivers.

579 Biogeosciences 8, 3069-3076.  
580 Jean-Baptiste, P., Poisson, A., 2000. Gas transfer experiment on a lake (Kerguelen Islands) using He-3  
581 and SF6. *Journal of Geophysical Research-Oceans* 105, 1177-1186.  
582 Lauerwald, R., Laruelle, G.G., Hartmann, J., Ciais, P., Regnier, P.A.G., 2015. Spatial patterns in CO2  
583 evasion from the global river network. *Global Biogeochemical Cycles* 29, 534-554.  
584 Lewis, E., Wallace, D., Allison, L.J., 1998. Program developed for CO<sub>2</sub> system calculations. ;  
585 Brookhaven National Lab., Dept. of Applied Science, Upton, NY (United States); Oak Ridge National  
586 Lab., Carbon Dioxide Information Analysis Center, TN (United States), p. Medium: ED; Size: 40 p.  
587 Li, S., Bush, R.T., 2015. Revision of methane and carbon dioxide emissions from inland waters in India.  
588 *Global Change Biology* 21, 6-8.  
589 Li, S., Bush, R.T., Ward, N.J., Sullivan, L.A., Dong, F., 2016. Air-water CO2 outgassing in the Lower Lakes  
590 (Alexandrina and Albert, Australia) following a millennium drought. *Science of the Total Environment*  
591 542, 453-468.  
592 Li, S., Gu, S., Tan, X., Zhang, Q., 2009. Water quality in the upper Han River basin, China: The impacts  
593 of land use/land cover in riparian buffer zone. *Journal of Hazardous Materials* 165, 317-324.  
594 Li, S., Ni, M., Mao, R., Bush, R.T., 2018. Riverine CO2 supersaturation and outgassing in a subtropical  
595 monsoonal mountainous area (Three Gorges Reservoir Region) of China. *Journal of Hydrology* 558,  
596 460-469.  
597 Li, S., Wang, F., Luo, W., Wang, Y., Deng, B., 2017. Carbon dioxide emissions from the Three Gorges  
598 Reservoir, China. *Acta Geochimica* <https://doi.org/10.1007/s11631-017-0154-6>  
599 Li, S.Y., Lu, X.X., Bush, R.T., 2013. CO2 partial pressure and CO2 emission in the Lower Mekong River.  
600 *Journal of Hydrology* 504, 40-56.  
601 Li, S.Y., Lu, X.X., He, M., Zhou, Y., Li, L., Ziegler, A.D., 2012. Daily CO2 partial pressure and CO2  
602 outgassing in the upper Yangtze River basin: A case study of the Longchuan River, China. *Journal of*  
603 *Hydrology* 466, 141-150.  
604 Liu, S., Lu, X.X., Xia, X., Yang, X., Ran, L., 2017. Hydrological and geomorphological control on CO2  
605 outgassing from low-gradient large rivers: An example of the Yangtze River system. *Journal of*  
606 *Hydrology* 550, 26-41.  
607 Liu, S., Lu, X.X., Xia, X., Zhang, S., Ran, L., Yang, X., Liu, T., 2016. Dynamic biogeochemical controls on  
608 river pCO<sub>2</sub> and recent changes under aggravating river impoundment: An example of the subtropical  
609 Yangtze River. *Global Biogeochemical Cycles* 30, 880-897.  
610 Lorke, A., Bodmer, P., Noss, C., Alshboul, Z., Koschorreck, M., Somlai-Haase, C., Bastviken, D., Flury, S.,  
611 McGinnis, D.F., Maeck, A., Mueller, D., Premke, K., 2015. Technical note: drifting versus anchored flux  
612 chambers for measuring greenhouse gas emissions from running waters. *Biogeosciences* 12,  
613 7013-7024.  
614 Mao, R., Chen, H., Li, S., 2017. Phosphorus availability as a primary control of dissolved organic carbon  
615 biodegradation in the tributaries of the Yangtze River in the Three Gorges Reservoir Region. *Science of the*  
616 *Total Environment* 574, 1472-1476.  
617 Prytherch, J., Brooks, I.M., Crill, P.M., Thornton, B.F., Salisbury, D.J., Tjernstrom, M., Anderson, L.G.,  
618 Geibel, M.C., Humborg, C., 2017. Direct determination of the air-sea CO2 gas transfer velocity in Arctic  
619 sea ice regions. *Geophysical Research Letters* 44, 3770-3778.  
620 Ran, L., Li, L., Tian, M., Yang, X., Yu, R., Zhao, J., Wang, L., Lu, X.X., 2017. Riverine CO2 emissions in the  
621 Wuding River catchment on the Loess Plateau: Environmental controls and dam impoundment impact.  
622 *Journal of Geophysical Research-Biogeosciences* 122, 1439-1455.

623 Ran, L.S., Lu, X.X., Yang, H., Li, L.Y., Yu, R.H., Sun, H.G., Han, J.T., 2015. CO<sub>2</sub> outgassing from the Yellow  
624 River network and its implications for riverine carbon cycle. *Journal of Geophysical*  
625 *Research-Biogeosciences* 120, 1334-1347.

626 Raymond, P.A., Cole, J.J., 2001. Gas exchange in rivers and estuaries: Choosing a gas transfer velocity.  
627 *Estuaries* 24, 312-317.

628 Raymond, P.A., Hartmann, J., Lauerwald, R., Sobek, S., McDonald, C., Hoover, M., Butman, D., Striegl,  
629 R., Mayorga, E., Humborg, C., Kortelainen, P., Duerr, H., Meybeck, M., Ciais, P., Guth, P., 2013. Global  
630 carbon dioxide emissions from inland waters. *Nature* 503, 355-359.

631 Raymond, P.A., Zappa, C.J., Butman, D., Bott, T.L., Potter, J., Mulholland, P., Laursen, A.E., Mcdowell,  
632 W.H., Newbold, D., 2012. Scaling the gas transfer velocity and hydraulic geometry in streams and small  
633 rivers. *Limnology & Oceanography Fluids & Environments* 2, 41-53.

634 Tranvik, L.J., Downing, J.A., Cotner, J.B., Loiselle, S.A., Striegl, R.G., Ballatore, T.J., Dillon, P., Finlay, K.,  
635 Fortino, K., Knoll, L.B., 2009. Lakes and reservoirs as regulators of carbon cycling and climate.  
636 *Limnology & Oceanography* 54, 2298-2314.

637 Wang, F., Wang, B., Liu, C.Q., Wang, Y., Guan, J., Liu, X., Yu, Y., 2011. Carbon dioxide emission from  
638 surface water in cascade reservoirs-river system on the Maotiao River, southwest of China.  
639 *Atmospheric Environment* 45, 3827-3834.

640 Wang, X.F., He, Y.X., Yuan, X.Z., Chen, H., Peng, C.H., Zhu, Q., Yue, J.S., Ren, H.Q., Deng, W., Liu, H.,  
641 2017. pCO<sub>2</sub> and CO<sub>2</sub> fluxes of the metropolitan river network in relation to the urbanization of  
642 Chongqing, China. *Journal of Geophysical Research-Biogeosciences* 122, 470-486.

643 Wanninkhof, R., 1992. RELATIONSHIP BETWEEN WIND-SPEED AND GAS-EXCHANGE OVER THE OCEAN.  
644 *Journal of Geophysical Research-Oceans* 97, 7373-7382.

645 Wanninkhof, R., Asher, W.E., Ho, D.T., Sweeney, C., McGillis, W.R., 2009. Advances in Quantifying  
646 Air-Sea Gas Exchange and Environmental Forcing. *Annual Review of Marine Science* 1, 213-244.

647 Wanninkhof, R., Knox, M., 1996. Chemical enhancement of CO<sub>2</sub> exchange in natural waters. *Limnology*  
648 *and Oceanography* 41, 689-697.

649 Xiao, S., Yang, H., Liu, D., Zhang, C., Lei, D., Wang, Y., Peng, F., Li, Y., Wang, C., Li, X., Wu, G., Liu, L., 2014.  
650 Gas transfer velocities of methane and carbon dioxide in a subtropical shallow pond. *Tellus Series*  
651 *B-Chemical and Physical Meteorology* 66.

652 Yang, L., Lu, F., Wang, X., Duan, X., Tong, L., Ouyang, Z., Li, H., 2013. Spatial and seasonal variability of  
653 CO<sub>2</sub> flux at the air-water interface of the Three Gorges Reservoir. *Journal of Environmental Sciences*  
654 25, 2229-2238.

655 Yao, G.R., Gao, Q.Z., Wang, Z.G., Huang, X.K., He, T., Zhang, Y.L., Jiao, S.L., Ding, J., 2007. Dynamics of  
656 CO<sub>2</sub> partial pressure and CO<sub>2</sub> outgassing in the lower reaches of the Xijiang River, a subtropical  
657 monsoon river in China. *Science of the Total Environment* 376, 255-266.

658 Zhang, J., Li, S., Dong, R., Jiang, C., 2018. Physical evolution of the Three Gorges Reservoir using  
659 advanced SVM on Landsat images and SRTM DEM data. *Environmental Science and Pollution Research*  
660 25, 14911-14918.

661 Zhang, T., Li, J., Pu, J., Martin, J.B., Khadka, M.B., Wu, F., Li, L., Jiang, F., Huang, S., Yuan, D., 2017. River  
662 sequesters atmospheric carbon and limits the CO<sub>2</sub> degassing in karst area, southwest China. *Science*  
663 *of The Total Environment* 609, 92-101.

664

665 **Table 1.** Statistics of all the data from [three river systems \(separated statistics please](#)  
 666 [refer to Figs. S2 and S3 in the Supplementary material\)s.](#)

|                 |             | Water T (°C) | pH   | Alkalinity (µeq/l) | pCO <sub>2</sub> (µatm) | DO%   | DOC<br>(mg/L) | TDN<br>(mg/L) | TDP<br>(µg/L) |
|-----------------|-------------|--------------|------|--------------------|-------------------------|-------|---------------|---------------|---------------|
| Number          |             | 115          | 115  | 115                | 115                     | 56    | 114           | 114           | 113           |
| Mean            |             | 22.5         | 8.39 | 2589.1             | 846.4                   | 91.5  | 6.67          | 2.42          | 65.9          |
| Median          |             | 22.8         | 8.46 | 2560               | 588.4                   | 88.8  | 2.51          | 1.56          | 50.7          |
| Std. Deviation  |             | 6.3          | 0.29 | 640.7              | 818.5                   | 8.7   | 7.62          | 2.38          | 56.3          |
| Minimum         |             | 11.7         | 7.47 | 600                | 50.1                    | 79.9  | 0.33          | 0.01          | 5.0           |
| Maximum         |             | 34           | 9.38 | 4488               | 4830.4                  | 115.9 | 37.48         | 10.54         | 298.5         |
| Percentiles     | 25          | 16.3         | 8.24 | 2240               | 389.8                   | 84.0  | 1.33          | 0.62          | 25.1          |
|                 | 75          | 29           | 8.56 | 2920               | 920.4                   | 99.1  | 9.96          | 3.61          | 88.1          |
| 95% CI for Mean | Lower Bound | 21.4         | 8.33 | 2470.8             | 695.2                   | 89.1  | 5.26          | 1.98          | 55.4          |
|                 | Upper Bound | 23.7         | 8.44 | 2707.5             | 997.6                   | 93.8  | 8.09          | 2.86          | 76.4          |

667

668 CI-Confidence Interval.

669 | **Table 2.** Comparison of different model for CO<sub>2</sub> areal flux estimation using combined  
 670 | data (unit is mmol/m<sup>2</sup>/d for CO<sub>2</sub> areal flux and cm/h for k<sub>600</sub>).  
 671

| CO <sub>2</sub> areal flux <sup>a</sup> | From FC           | Flow velocity-based model (Fig. 43b) | Water depth-based model (Fig.3a) | Alin's model |       |
|-----------------------------------------|-------------------|--------------------------------------|----------------------------------|--------------|-------|
| k <sub>600</sub>                        | 48.4 <sup>b</sup> | 116.5 <sup>c</sup>                   | 38.3                             | 37.6         |       |
| Mean                                    | 198.1             | 476.7                                | 156.6                            | 154.0        |       |
| S.D.                                    | 185.5             | 446.2                                | 146.6                            | 144.2        |       |
| 95% CI for Mean                         | Lower Bound       | 129.5                                | 311.5                            | 102.3        | 100.6 |
|                                         | Upper Bound       | 266.8                                | 641.8                            | 210.8        | 207.4 |

672

673 CI-Confidence Interval

674 a-CO<sub>2</sub> areal flux is based on TBL model.

675 b-mean level that is determined using floating chambers (FC).

676 c-This figure is revised to be 49.6 cm/h if the model ( $k_{600} = 62.879FV + 6.8357$ ,  $R^2 =$   
 677 |  $0.52$ ,  $p=0.019$ ) is used (Fig. 43c), and the corresponding CO<sub>2</sub> areal flux is  $203 \pm 190$   
 678 | mmol/m<sup>2</sup>/d.  
 679

680 **Table 3.** CO<sub>2</sub> emission from total rivers sampled in the study.

681 (a) Upscaling using CO<sub>2</sub> areal flux by FC.

|           | Catchment Area<br>km <sup>2</sup> | Water surface<br>km <sup>2</sup> | CO <sub>2</sub> areal flux<br>mmol/m <sup>2</sup> /d | CO <sub>2</sub> emission<br>Tg CO <sub>2</sub> /y |
|-----------|-----------------------------------|----------------------------------|------------------------------------------------------|---------------------------------------------------|
| Danang    | 4200                              | 21.42                            | 122.0 ± 239.4                                        | 0.042                                             |
| Qijiang   | 4400                              | 30.8                             | 50.3 ± 177.2                                         | 0.025                                             |
| TGR river | 50000                             | 377.78                           | 217.7 ± 334.7                                        | 1.321                                             |
| Total     |                                   |                                  |                                                      | 1.39                                              |

682

683 (b) Upscaling using determined  $k_{600}$  average and models (whole dataset are used  
684 here).

|                       | From<br>determined<br>$k_{600}$ mean | Flow velocity-based model (Fig.<br><u>43b</u> ) (numbers in bracket is from the<br>revised model; Fig. <u>43c</u> ) | Water depth-based model<br>(Fig. <u>43a</u> ) | Alin's<br>model |      |
|-----------------------|--------------------------------------|---------------------------------------------------------------------------------------------------------------------|-----------------------------------------------|-----------------|------|
| Mean                  | 1.37                                 | 3.29 (1.40)                                                                                                         | 1.08                                          | 1.06            |      |
| S.D.                  | 1.28                                 | 3.08 (1.31)                                                                                                         | 1.01                                          | 1.00            |      |
| 95% CI<br>for<br>Mean | Lower<br>Bound                       | 0.89                                                                                                                | 2.15 (0.91)                                   | 0.71            | 0.69 |
|                       | Upper<br>Bound                       | 1.84                                                                                                                | 4.43 (1.81)                                   | 1.46            | 1.43 |

带格式的：下标

带格式的：下标

685 A total water area of approx. 430 km<sup>2</sup> for all tributaries (water area is from Landsat

686 ETM+ in 2015).

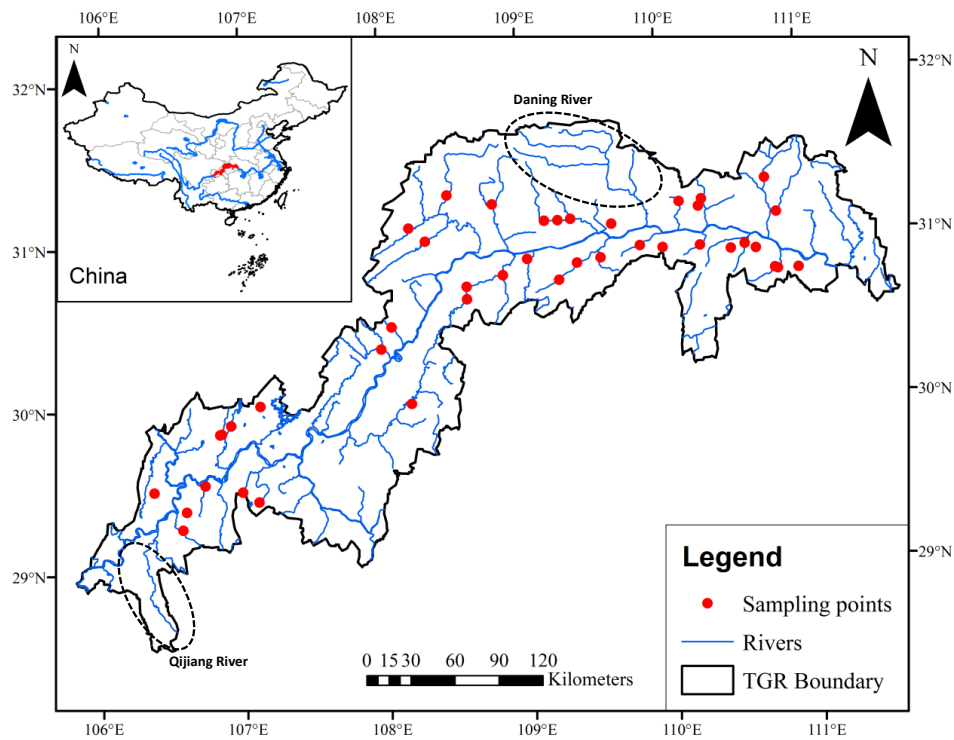

带格式的: 字体颜色: 文字 1  
带格式的: 字体: 小四, 加粗, 字体颜色: 文字 1

687

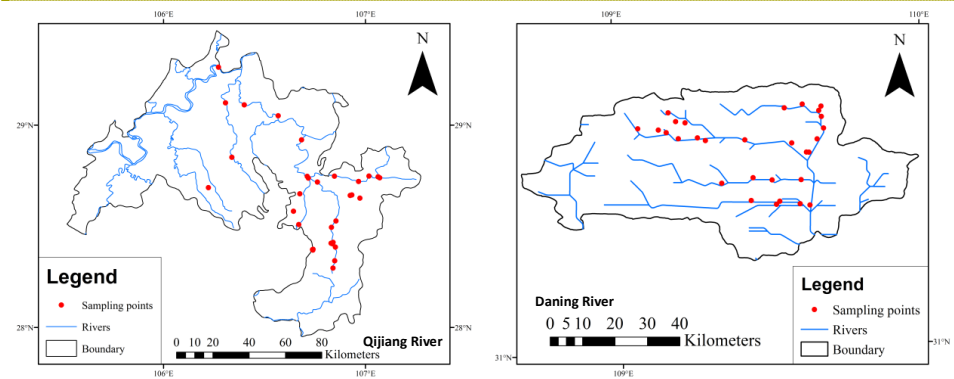

带格式的: 字体: 小四, 加粗, 字体颜色: 文字 1

688

689 **Fig. 1. Map of sampling locations of major rivers and streams in the Three Gorges**  
690 **Reservoir region, China.**

带格式的: 字体: (默认) Times New Roman

691



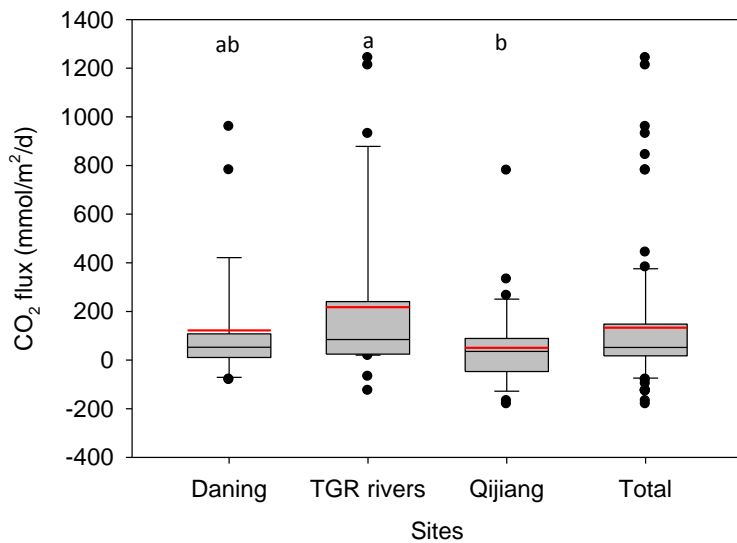

692

693 **Fig. 24.** Boxplots of CO<sub>2</sub> emission rates by floating chambers in the [investigated three](#)  
 694 [river systems subtropical rivers](#) (different letters represent statistical differences at  
 695  $p < 0.05$  by **Mann-Whitney Rank Sum Test**). (the black and red lines, lower and upper  
 696 edges, bars and dots in or outside the boxes demonstrate median and mean values,  
 697 25th and 75th, 5th and 95th, and <5th and >95<sup>th</sup> percentiles of all data, respectively).  
 698 (For interpretation of the references to color in this figure legend, the reader is  
 699 referred to the web version of this article) ([Total means combined data from three](#)  
 700 [river systems](#)).

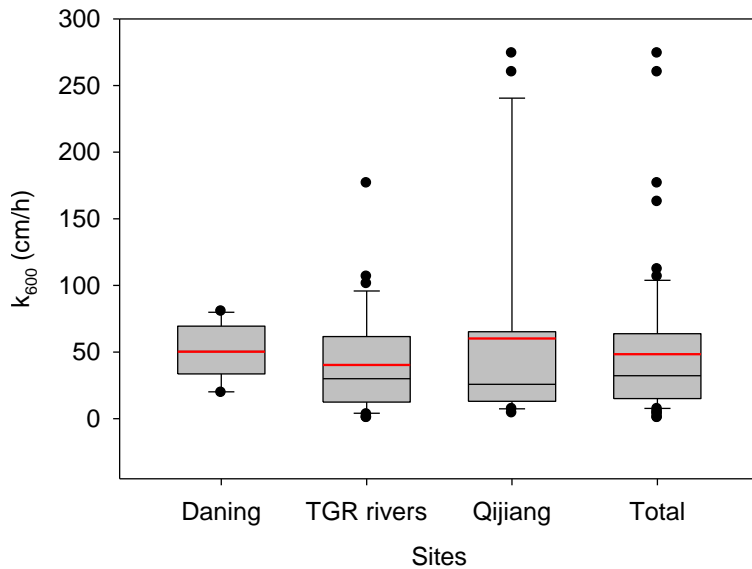

701

702 | **Fig. 32.** Boxplots of  $k_{600}$  levels in the investigated three river systems subtropical rivers  
 703 (there is not a statistically significant difference in  $k$  among sites by Mann-Whitney  
 704 Rank Sum Test). (the black and red lines, lower and upper edges, bars and dots in or  
 705 outside the boxes demonstrate median and mean values, 25th and 75th, 5th and  
 706 95th, and <5th and >95<sup>th</sup> percentiles of all data, respectively). (For interpretation of  
 707 the references to color in this figure legend, the reader is referred to the web version  
 708 | of this article) (Total means combined data from three river systems).

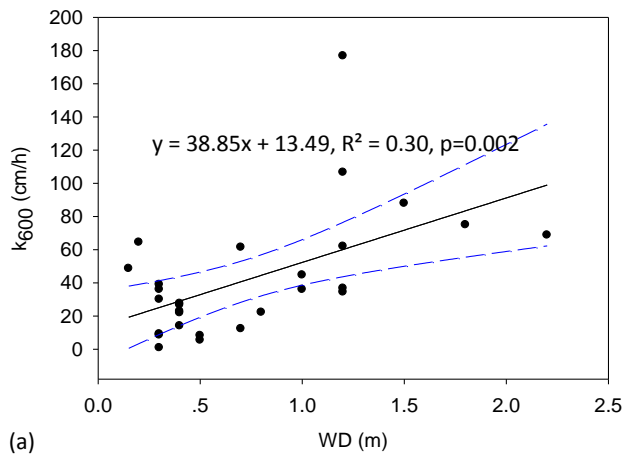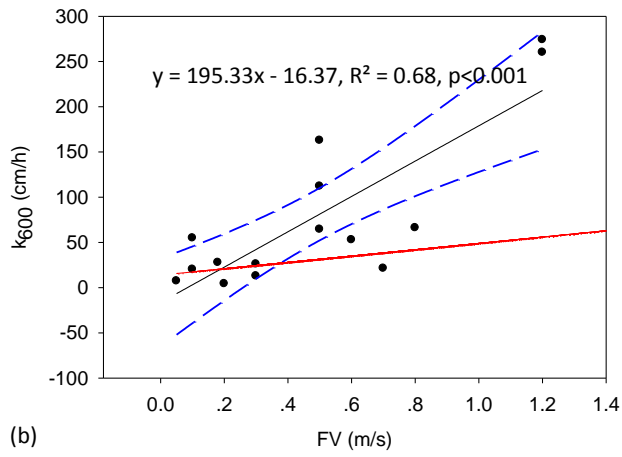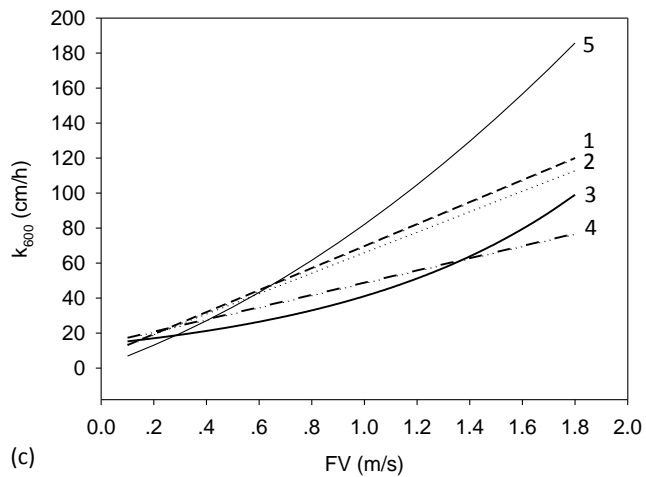

713 | **Fig. 43.** The  $k_{600}$  as a function of water depth (WD) using data from TGR rivers (a),

714 | flow velocity (FV) using data from in Qijiang (b), and comparison of the developed  
715 | model with other models (c) (others without significant relationships between k and  
716 | physical factors are not shown). The solid lines show regression, the dashed lines  
717 | represent 95% confidence band, and the red dash-dotted line represents the model  
718 | developed by Alin et al (2011) (~~in panel b~~, if several extremely values are removed in  
719 | panel b, the revised model would be  $k_{600} = 62.879FV + 6.8357$ ,  $R^2 = 0.52$ ,  $p=0.019$ ) (in  
720 | panel c, 1-the revised model, 2-model from Ran et al., 2017, 3-model from Ran et al.,  
721 | 2015, 4-model from Alin et al., 2011, 5-model from Liu et al., 2017) (1-  $k_{600} =$   
722 |  $62.879FV + 6.8357$ ; 2-  $k_{600} = 58.47FV+7.99$ ; 3-  $k_{600} = 13.677\exp(1.1FV)$ ; 4-  $k_{600} = 35 FV$   
723 |  $+ 13.82$ ; 5-  $k_{600} = 6.5FV^2 + 12.9FV+0.3$ ) (unit of k in models 1-4 is cm/h, and unit of  
724 | m/d for model 5 is transferred to cm/h).

725
